1 **Title: Structural neurodevelopment at the individual level - a life-course investigation using**  
2 **ABCD, IMAGEN and UK Biobank data**

3  
4 **Authors:** Runye Shi<sup>1†</sup>, Shitong Xiang<sup>2,3†</sup>, Tianye Jia<sup>2,3,4,5†</sup>, Trevor W. Robbins<sup>2,3,6</sup>, Jujiao Kang<sup>2,3</sup>, Tobias  
5 Banaschewski<sup>7</sup>, Gareth J. Barker<sup>8</sup>, Arun L.W. Bokde<sup>9</sup>, Sylvane Desrivieres<sup>10</sup>, Herta Flor<sup>11,12</sup>, Antoine Grigis<sup>13</sup>,  
6 Hugh Garavan<sup>14</sup>, Penny Gowland<sup>15</sup>, Andreas Heinz<sup>16</sup>, Rüdiger Brühl<sup>17</sup>, Jean-Luc Martinot<sup>18</sup>, Marie-Laure  
7 Paillère Martinot<sup>19</sup>, Eric Artiges<sup>20</sup>, Frauke Nees<sup>7,11,21</sup>, Dimitri Papadopoulos Orfanos<sup>13</sup>, Tomáš Paus<sup>22,23</sup>, Luise  
8 Poustka<sup>24</sup>, Sarah Hohmann<sup>7</sup>, Sabina Millenet<sup>7</sup>, Juliane H. Fröhner<sup>25</sup>, Michael N. Smolka<sup>25</sup>, Nilakshi Vaidya<sup>26</sup>,  
9 Henrik Walter<sup>16</sup>, Robert Whelan<sup>27</sup>, Gunter Schumann<sup>5,26</sup>, Xiaolei Lin<sup>1\*</sup>, Barbara J. Sahakian<sup>2,3,6\*</sup>, Jianfeng  
10 Feng<sup>1,2,3,28,29\*</sup>, IMAGEN Consortium

11 **Affiliations:**

12 <sup>1</sup> School of Data Science, Fudan University, Shanghai, China

13 <sup>2</sup> Institute of Science and Technology for Brain-Inspired Intelligence, Fudan University, Shanghai, China

14 <sup>3</sup> Key Laboratory of Computational Neuroscience and Brain-Inspired Intelligence (Fudan University), Ministry  
15 of Education, China

16 <sup>4</sup> Centre for Population Neuroscience and Precision Medicine (PONS), Institute of Psychiatry, Psychology &  
17 Neuroscience, SGDP Centre, King's College London, United Kingdom, SE5 8AF

18 <sup>5</sup> Centre for Population Neuroscience and Precision Medicine (PONS), Institute of Science and Technology for  
19 Brain-Inspired Intelligence (ISTBI), Fudan University, Shanghai, China

20 <sup>6</sup> Department of Psychology and Behavioural and Clinical Neuroscience Institute, University of Cambridge,  
21 Cambridge, United Kingdom

22 <sup>7</sup> Department of Child and Adolescent Psychiatry and Psychotherapy, Central Institute of Mental Health,  
23 Medical Faculty Mannheim, Heidelberg University, Square J5, 68159 Mannheim, Germany

24 <sup>8</sup> Department of Neuroimaging, Institute of Psychiatry, Psychology & Neuroscience, King's College London,  
25 United Kingdom

26 <sup>9</sup> Discipline of Psychiatry, School of Medicine and Trinity College Institute of Neuroscience, Trinity College  
27 Dublin, Dublin, Ireland

28 <sup>10</sup> Centre for Population Neuroscience and Precision Medicine (PONS), Institute of Psychiatry, Psychology &  
29 Neuroscience, SGDP Centre, King's College London, United Kingdom

30 <sup>11</sup> Institute of Cognitive and Clinical Neuroscience, Central Institute of Mental Health, Medical Faculty  
31 Mannheim, Heidelberg University, Square J5, Mannheim, Germany

32 <sup>12</sup> Department of Psychology, School of Social Sciences, University of Mannheim, 68131 Mannheim,  
33 Germany

34 <sup>13</sup> NeuroSpin, CEA, Université Paris-Saclay, F-91191 Gif-sur-Yvette, France

35 <sup>14</sup> Departments of Psychiatry and Psychology, University of Vermont, 05405 Burlington, Vermont, USA

36 <sup>15</sup> Sir Peter Mansfield Imaging Centre School of Physics and Astronomy, University of Nottingham,  
37 University Park, Nottingham, United Kingdom

38 <sup>16</sup> Department of Psychiatry and Psychotherapy CCM, Charité – Universitätsmedizin Berlin, corporate member  
39 of Freie Universität Berlin, Humboldt-Universität zu Berlin, and Berlin Institute of Health, Berlin, Germany;

40 <sup>17</sup> Physikalisch-Technische Bundesanstalt (PTB), Braunschweig and Berlin, Germany

41 <sup>18</sup> Institut National de la Santé et de la Recherche Médicale, INSERM U A10 "Trajectoires développementales  
42 en psychiatrie"; Université Paris-Saclay, Ecole Normale supérieure Paris-Saclay, CNRS, Centre Borelli; Gif-  
43 sur-Yvette, France

44 <sup>19</sup> Institut National de la Santé et de la Recherche Médicale, INSERM U A10 "Trajectoires développementales  
45 & psychiatrie", University Paris-Saclay, Ecole Normale Supérieure Paris-Saclay, CNRS; Centre Borelli, Gif-  
46 sur-Yvette, France; and AP-HP. Sorbonne Université, Department of Child and Adolescent Psychiatry, Pitié-  
47 Salpêtrière Hospital, Paris, France

48 <sup>20</sup> Institut National de la Santé et de la Recherche Médicale, INSERM U A10 "Trajectoires développementales  
49 en psychiatrie"; Université Paris-Saclay, Ecole Normale supérieure Paris-Saclay, CNRS, Centre Borelli, Gif-  
50 sur-Yvette; and Psychiatry Department, EPS Barthélémy Durand, Etampes, France

51 <sup>21</sup> Institute of Medical Psychology and Medical Sociology, University Medical Center Schleswig-Holstein Kiel  
52 University, Kiel, Germany

53 <sup>22</sup> Department of Psychiatry, Faculty of Medicine and Centre Hospitalier Universitaire Sainte-Justine,  
54 University of Montreal, Montreal, Quebec, Canada

55 <sup>23</sup> Departments of Psychiatry and Psychology, University of Toronto, Toronto, Ontario, Canada

56 <sup>24</sup> Department of Child and Adolescent Psychiatry and Psychotherapy, University Medical Centre Göttingen,  
57 von-Siebold-Str. 5, 37075, Göttingen, Germany

58 <sup>25</sup> Department of Psychiatry and Neuroimaging Center, Technische Universität Dresden, Dresden, Germany;

59 <sup>26</sup> Centre for Population Neuroscience and Stratified Medicine (PONS), Department of Psychiatry and  
60 Psychotherapy, Charité Universitätsmedizin Berlin, Germany

61 <sup>27</sup> School of Psychology and Global Brain Health Institute, Trinity College Dublin, Ireland

62 <sup>28</sup> MOE Frontiers Center for Brain Science, Fudan University, Shanghai, China

63 <sup>29</sup> Zhangjiang Fudan International Innovation Center, Shanghai, China

64

65 † These authors contributed equally to this work.

66 \* Correspondence authors.

67 Xiaolei Lin (Address: School of Data Science, Fudan University, Shanghai, 200433, China. Email:

68 [xiaoleilin@fudan.edu.cn](mailto:xiaoleilin@fudan.edu.cn))

69 or

70 Barbara Sahakian (Address: Department of Psychology and Behavioural and Clinical Neuroscience Institute,

71 University of Cambridge, Cambridge, United Kingdom. Email: [bjs1001@cam.ac.uk](mailto:bjs1001@cam.ac.uk))

72 or

73 Jianfeng Feng (Address: Institute of Science and Technology for Brain-inspired Intelligence, Fudan University,  
74 Shanghai, 200433, China. Email: jianfeng64@gmail.com)

75  
76  
77  
78  
79

## 80 **Abstract**

81 Adolescents exhibit remarkable heterogeneity in the structural architecture of brain development.  
82 However, due to the lack of large-scale longitudinal neuroimaging studies, existing research has  
83 largely focused on population averages and the neurobiological basis underlying individual  
84 heterogeneity remains poorly understood. Using structural magnetic resonance imaging from the  
85 IMAGEN cohort (n=1,543), we show that adolescents can be clustered into three groups defined  
86 by distinct developmental patterns of whole-brain gray matter volume (GMV). Genetic and  
87 epigenetic determinants of group clustering and long-term impacts of neurodevelopment in mid-  
88 to-late adulthood were investigated using data from the ABCD, IMAGEN and UK Biobank  
89 cohorts. Group 1, characterized by continuously decreasing GMV, showed generally the best  
90 neurocognitive performances during adolescence. Compared to Group 1, Group 2 exhibited a  
91 slower rate of GMV decrease and worsened neurocognitive development, which was associated  
92 with epigenetic changes and greater environmental burden. Further, Group 3 showed increasing  
93 GMV and delayed neurocognitive development during adolescence due to a genetic variation,  
94 while these disadvantages were attenuated in mid-to-late adulthood. In summary, our study  
95 revealed novel clusters of adolescent structural neurodevelopment and suggested that  
96 genetically-predicted delayed neurodevelopment has limited long-term effects on mental well-  
97 being and socio-economic outcomes later in life. Our results could inform future research on  
98 policy interventions aimed at reducing the financial and emotional burden of mental illness.

99

100

101

## 102 **Keywords:**

103 structural neurodevelopment; longitudinal magnetic resonance imaging; individual trajectory of  
104 neurodevelopment; genetic and environmental factors of brain development;

105 **Main**

106 Adolescence is a critical and active period for brain reconstruction and maturation, with regional  
107 changes of synaptic morphology, dendritic arborization, cortical cell firing and changes in  
108 neurochemical receptor affinity<sup>1-3</sup>. Clinical symptoms of many neuropsychiatric disorders start  
109 to emerge during this period, including conduct disorder, mood disorder and schizophrenia<sup>4-7</sup>.  
110 Structural neurodevelopment during adolescence is important for enhanced cognitive abilities  
111 and mental well-being persisting into adulthood<sup>8-16</sup>. Population-based studies have shown that  
112 adolescents exhibit remarkable heterogeneity in terms of structural neurodevelopment<sup>17-19</sup>, but  
113 the neurobiological basis of the heterogeneity remains poorly understood. Most efforts have been  
114 devoted to study the functional circuitry and structural composition of the brain and their  
115 associations with mental health disorders at the population level<sup>1,20-25</sup>. These pioneering studies  
116 have leveraged large population cohorts and refined our understanding of the adolescent brain.  
117 However, associations between behavioral patterns and trajectories of brain development vary at  
118 the individual level and understanding the sources of variation remains imperative in the arena of  
119 public health and precision medicine<sup>12,18,26,27</sup>.

120  
121 Large-scale longitudinal neuroimaging studies have enabled delineation of the dynamic changes  
122 of individual brain morphology, by clustering adolescents according to their developmental  
123 trajectories of neuroimaging-derived phenotypes. Similar approaches have yielded associations  
124 between atypical brain structure and neuroanatomical variation across neuropsychiatric  
125 disorders<sup>28</sup>. Neuroimaging biomarkers offered tremendous versatility to determine the  
126 neuropathological mechanisms of neurodegenerative and mental illnesses<sup>29-33</sup>, but have yet not  
127 been fully utilized for neurodevelopment. Structural magnetic resonance imaging (sMRI)  
128 provides non-invasive measures of imaging-derived phenotypes, among which the  
129 developmental courses of gray matter volume (GMV) were shown to be strongly associated with  
130 myelinogenesis and synaptic plasticity during adolescence<sup>34-38</sup>. Collectively, this raises the  
131 possibility of identifying novel clusters of dynamic brain structure according to the growth  
132 trajectories of whole-brain GMV architecture.

133  
134 In this study, we aim to investigate the individual heterogeneity of adolescent brain development,  
135 potential genetic, epigenetic and environmental factors that could contribute to the heterogeneity,

136 and possible long-term impacts of the heterogeneous brain developmental patterns on the  
137 biological and social wellbeing later in life. To accomplish these goals, we employ a data-driven  
138 approach to cluster adolescents into groups with distinct whole-brain GMV developmental  
139 patterns using longitudinal neuroimaging data from the IMAGEN cohort that spanned the entire  
140 period of adolescence and early adulthood (schematic workflow in Fig. 1a). Both genome-wide  
141 and epigenome-wide association studies are conducted to dissect the genetic and epigenetic  
142 changes associated with each cluster.

143

## 144 **Results**

### 145 **Developmental trajectories of whole-brain GMV during adolescence define three clusters.**

146 We began by estimating the longitudinal trajectories of GMV in 44 brain regions of interest  
147 (ROIs) (34 cortical and 10 subcortical ROIs) that spanned the whole brain of each adolescent  
148 across baseline (at age 14y) and two follow-up scans (at age 19y and 23y) in the IMAGEN study,  
149 adjusting for intracranial volume (ICV), sex, handedness and site (Methods). Individuals showed  
150 strong heterogeneity and clustering patterns in terms of baseline total GMV and GMV  
151 developmental trajectories (Supplementary Fig. 1). Next, we reasoned that neurobiologically  
152 meaningful clusters could be explained by the developmental patterns in a subset of ROIs.  
153 Therefore, we conducted dimension reduction via principal component analysis (PCA) and  
154 selected the first 15 principal components (PCs), which explained 80% of the total variation in  
155 whole-brain GMV trajectories, in the clustering analysis (Supplementary Table 1). The first and  
156 second PCs defined two combinations of GMV trajectories over the entire brain that were  
157 significantly associated with baseline total GMV (Supplementary Fig. 2a). However, they  
158 exhibited different association patterns with items of the Cambridge Gambling Task, where PC1  
159 was significantly associated with delay aversion ( $r = 0.07$ ,  $P_{adj} = 0.30$ ) and risk adjustment ( $r = -$   
160  $0.08$ ,  $P_{adj} = 0.020$ ), and PC2 was significantly associated with deliberation time ( $r = 0.1$ ,  $P_{adj} =$   
161  $0.003$ ), overall betting (proportion bet) ( $r = 0.07$ ,  $P_{adj} = 0.014$ ) and risk-taking ( $r = 0.08$ ,  $P_{adj} =$   
162  $0.008$ ) (Supplementary Fig. 2b). These PCs were then used in the multivariate clustering to  
163 identify groups of adolescents with distinct neurodevelopmental patterns.

164

165 Among 1,543 adolescents with at least two sMRI scans, our analyses identified three clusters of  
166 structural neurodevelopment ( $P_{\text{permutation}} < 0.001$ ) (Supplementary Fig. 3). Group 1 consisted of

167 711 (46.1%) adolescents, had high baseline total GMV and continuously decreasing GMV at  
168 follow-ups, which was consistent with the population GMV developmental trend<sup>28</sup>. Group 2  
169 included 765 (49.6%) adolescents and compared to Group 1, they had lower baseline total GMV,  
170 lower peak GMV, and slower rate of GMV decrease. In addition, adolescents in Group 2 are  
171 more likely to be older ( $Diff = 0.11y$ ,  $P < 0.001$ ) and be males ( $Diff = 9.5\%$ ,  $P < 0.001$ ), have  
172 lower parental education ( $P = 0.020$  for maternal education;  $P = 0.003$  for paternal education) and  
173 lower WISCIV full score at age 14 ( $Diff = -1.76$ ,  $P = 0.011$ ). The remaining 67 (4.3%) belonged  
174 to Group 3, among whom we observed the lowest baseline total GMV and surprisingly  
175 increasing GMV at follow-ups, which was opposite to the population developmental trend (Fig.  
176 1b, Supplementary Fig. 4-6). Compared to Group 1, Adolescents in Group 3 are more likely to  
177 have lower parental education ( $P = 0.015$  for maternal education;  $P = 0.010$  for paternal  
178 education) and lower WISCIV full score at age 14 ( $Diff = -9.22$ ,  $P < 0.001$ ). The full  
179 demographic and baseline characteristics for each group were provided in Supplementary Table  
180 2. Since we aim to investigate group-specific brain developmental patterns in late childhood, we  
181 further estimated the age-specific GMV growth rate in each ROI from age 5y to 25y in each  
182 group (Methods) using population neurodevelopmental curve as a reference. Consistently we  
183 observed continuously decreasing GMV in Group 1 and Group 2 (with slower rate of GMV  
184 decrease in Group 2), and increasing GMV in Group 3 for most ROIs (Fig. 1c), indicating  
185 delayed neurodevelopment and brain maturation in Group 3 compared to the other groups.

186  
187 To understand the neurobiological basis of group heterogeneity, we next tested for differences in  
188 whole-brain GMV development among these groups. We observed common delayed GMV  
189 development in ROIs spanning the inferior temporal, middle temporal, lateral orbitofrontal,  
190 precentral and superior frontal areas in Group 3 (relative to Groups 1/2) (Fig. 1d top and  
191 Supplementary Table 3). Group 2 showed lower peak GMV and slower rate of GMV decrease in  
192 ROIs spanning superior frontal, caudal middle frontal, rostral middle frontal, precentral and  
193 inferior parietal areas (relative to Group 1) (Fig. 1d bottom and Supplementary Table 3). These  
194 are all among the last areas in the brain to mature and had been implicated to play a key role in  
195 executive functions. This led us to ask whether variations in structural neurodevelopment could  
196 predict the developmental trajectories of neurocognition and risk of neuropsychiatric disorders in  
197 these groups.

198

199 **Structural neurodevelopment predicts neurocognition and risk factors for neuropsychiatric**  
200 **disorders.**

201 To investigate the association between neurodevelopment and executive functions, we tested for  
202 differences of neurocognitive performance among these groups at baseline and at the last follow-  
203 up. Full results of these comparisons were provided in Supplementary Table 4. We found that  
204 compared to Group 1, Group 3 with delayed neurodevelopment showed worse neurocognitive  
205 performance (Spatial Working Memory, Cambridge Gambling Task (CGT) and Stop Signal Task  
206 (SST)) at baseline, but most of these items improved over time with brain maturation and  
207 became statistically equivalent at the last follow-up (Fig. 2a and Supplementary Fig. 7a). This  
208 can be predicted by the structural architecture of GMV development in Group 3, where  
209 increasing GMV in the top discriminating ROIs showed positive correlation with improvements  
210 of neurocognition (Supplementary Fig. 8 and Supplementary Table 5). In contrast, Group 2 with  
211 slower rate of GMV decrease showed worsened neurocognitive performance (CGT and SST) at  
212 the last follow-up relative to baseline (Fig. 2a and Supplementary Fig. 7b), which could be  
213 predicted by the negative correlations between the GMV developmental trajectories in the top  
214 discriminating ROIs and neurocognition (Supplementary Fig. 8 and Supplementary Table 6).

215

216 The delayed brain and neurocognitive development in Group 3 led us to ask whether these  
217 adolescents had increased risk for neuropsychiatric disorders. Consistent with the improvements  
218 of neurocognition, we observed decreased attention-deficit/hyperactivity disorder (ADHD)  
219 symptoms, but increased depression symptoms in Group 3 (Fig. 2b and Supplementary Table 4).  
220 This indicated that although neurocognitive abilities in Group 3 exhibited pronounced  
221 improvement during adolescence, this was not necessarily the case for mental disorder symptoms.  
222 Furthermore, consistent with their worsened neurocognitive performances, we observed  
223 increased depression symptoms in Group 2 at the last follow-up compared to baseline, (Fig. 2b  
224 and Supplementary Table 4). The continuously worsened neurocognition and mental health  
225 problems in Group 2 indicated biological, social and mental disadvantages among these  
226 adolescents.

227

228 Given the slightly different patterns of GMV development for males and females<sup>28</sup>, we  
229 conducted the analyses stratified by sex following the same workflow. Results of group  
230 clustering largely overlapped with the original analyses (Supplementary Table 7). In general, the  
231 sex-stratified analyses revealed similar patterns of neurocognition and mental health symptoms  
232 among three groups of adolescents. However, differences of neurocognition among these groups  
233 were manifested more for risk-taking and impulsive behaviors in males, while for spatial  
234 working memory in females (Supplementary Table 8). Besides, increase of the depressive  
235 symptoms in Group 2 was only observed in males, and increase of the depressive symptoms in  
236 Group 3 was only observed in females.

237  
238 In addition, we compared the genetic liability to major neurodevelopmental disorders and related  
239 traits, including ADHD, autism spectrum disorder (ASD), educational attainment (EA) and  
240 intelligence (IQ), by calculating the corresponding polygenic risk scores (PRS) for each  
241 adolescent. Group 3 had higher PRS for ADHD than both Group 1 ( $P_{adj} = 0.007$ ) and Group 2  
242 ( $P_{adj} = 0.017$ ), while Group 2 was not statistically different from Group 1 ( $P_{adj} = 0.42$ ). We did  
243 not observe significant differences among the three groups in terms of the PRS of ASD, EA and  
244 IQ (Supplementary Table 9). The higher genetic liability of ADHD in Group 3 led us to ask  
245 whether genetic variants could explain the delayed neurodevelopment and neurocognitive  
246 performances in this group.

#### 247 248 **Genetic variation and epigenetic changes contribute to structural neurodevelopment.**

249 To better understand the genetic basis of structural neurodevelopment, we conducted genome-  
250 wide association studies (GWAS) for Group 3 versus Groups 1/2 using group-reweighted GMV  
251 as the proxy-phenotype among 7,662 adolescents in ABCD, since GWAS was under-powered  
252 for the IMAGEN study due to limited sample size<sup>39</sup>. Group-reweighted GMV was derived and  
253 used as the proxy phenotype because GMV developmental patterns could not be estimated in  
254 ABCD due to limited age range. This continuous phenotype represented one's tendency of being  
255 in Group 3 relative to Groups 1/2, or in other words, one's propensity of having delayed brain  
256 development. Specifically, we began by calculating the ROI-specific weight in discriminating  
257 Group 3 (relative to Groups 1/2) in IMAGEN adjusting for potential confounders, and applying  
258 these weights to corresponding ROIs in ABCD to obtain the Group3-reweighted GMV, which



259 was then used as the proxy phenotype in the Group 3 GWAS (Methods). The Group3-reweighted  
260 GMV showed negative correlation with neurocognition in ABCD, indicating the validity of  
261 using Group3-reweighted GMV as appropriate proxy for delayed neurodevelopment (Fig. 3a and  
262 Supplementary Table 10). Similarly, Group2-reweighted GMV was calculated and used as the  
263 proxy phenotype in the Group 2 GWAS.

264  
265 One locus showed genome-wide significant effects in the Group 3 GWAS (Fig. 3b and  
266 Supplementary Table 11). The lead single-nucleotide polymorphisms (SNP), rs9375442 ( $\beta =$   
267  $0.52$ ,  $P = 1.02 \times 10^{-8}$ ) on chromosome 6, is an intronic variant located on *CENPW* (Supplementary  
268 Fig. 9). *CENPW* is a protein-coding gene involved in the packaging of telomere ends and cell  
269 cycle mitotic<sup>40,41</sup>, and increased *CENPW* expression in progenitors could lead to decreased  
270 cortical volume and cognitive function by altering neurogenesis or increasing apoptosis<sup>42</sup>. Other  
271 variants on these genes were reported to be associated with cortical surface area and brain  
272 volume<sup>43-48</sup> (Supplementary Fig. 10), general cognitive ability<sup>49-51</sup> and physical growth<sup>52-56</sup>.  
273 Gene-based association analysis confirmed the identification of *CENPW* (Supplementary Fig.  
274 11). Next, we conducted validation of the Group 3 GWAS back in IMAGEN. We began by  
275 calculating the polygenic risk score for SNPs ( $N_{SNP} = 4$ ) residing in *CENPW* (*CENPW* score) and  
276 across the whole genome (PRS) that are associated with Group3-reweighted GMV for each  
277 adolescent in IMAGEN, tested for the differences of PRS among these groups, and correlated the  
278 PRS with neurocognition and behavioral risk factors. Consistent with the Group 3 GWAS, we  
279 observed higher *CENPW* score in Group 3 relative to Groups 1/2 (Fig. 3c) and positive  
280 correlations between *CENPW* score and improvement of neurocognition and conduct problems  
281 (Fig. 3d). Similar results were obtained for PRS (Supplementary Fig. 12).

282  
283 No genome-wide significant SNPs were identified in the Group 2 GWAS (Supplementary Fig.  
284 13). However, the large overlap between the neurodevelopmental patterns and homogeneous  
285 genetic liability in Group 2 with Group 1 led us to reason that the differences of neurocognitive  
286 performances between Group 1 and 2 were quantitative (rather than qualitative) and might  
287 subject to the effects of environmental exposure. To test this, we performed epigenome-wide  
288 association studies (EWAS) in IMAGEN (Methods) using group label as the phenotype. A  
289 significant hypermethylation site cg06064461 ( $\beta = 25.40$ ,  $P = 4.24 \times 10^{-8}$ ) (Fig. 4a) was identified

290 and mapped to *ATF2* and *MIR933* on chromosome 2. *ATF2* encodes a transcription factor of the  
291 activator protein-1 family, is ubiquitously expressed in the brain and was found to be associated  
292 with both neurodegeneration and neurogenesis<sup>57-59</sup>. *MIR933* shares a common promoter with  
293 *ATF2* and offers neuroprotection against neurodegenerative diseases by regulating brain-derived  
294 neurotrophic factor (BDNF)<sup>60</sup>. To validate the EWAS results, we correlated the methylation of  
295 cg06064461 with estimated GMV trajectory and peak GMV in Groups 1/2, and calculated the  
296 mediation effects of cg06064461 methylation in the adverse environment - neurodevelopment  
297 pathway. Consistent with the EWAS results, positive correlation between cg06064461  
298 methylation and total GMV trajectory ( $r = 0.14$ ,  $P < 0.001$ ) (Fig. 4b) and negative correlation  
299 between cg06064461 methylation and peak GMV ( $r = -0.07$ ,  $P = 0.020$ ) (Fig. 4c) were observed.  
300 Although none mediation effects of cg06064461 methylation on the environment –  
301 neurodevelopment pathway showed statistical significance after correcting for multiple testing  
302 (Fig. 4d and Supplementary Table 12), nominal significance was observed for family affirmation,  
303 where higher level of family affirmation was associated with higher peak GMV through reduced  
304 cg06064461 methylation (Fig. 4e). Family affirmation was defined as behaviors that the parent  
305 puts in place to support or help children in various situations or to show them approval and  
306 affection and refers to parent-child relationship<sup>61</sup>. These results indicated that environmental  
307 exposure could contribute to disadvantaged neurodevelopment and neurocognition by inducing  
308 epigenetic changes of neurogenesis-related genes.

309  
310 **Genetic variation had limited effects on the cognitive, mental health and socio-economic**  
311 **outcomes in mid-to-late adulthood.**

312 Both genetic vulnerability and structural neurodevelopment are well-established to have  
313 profound impact on one's physical, social and mental well-being in mid-to-late adulthood<sup>62-65</sup>.  
314 However, the neurobiological mechanisms through which the long-term effects of genetic  
315 variation could be manifested remain largely unknown. We conclude our study by testing in the  
316 UK Biobank whether, and to what degree, polygenic risk for delayed neurodevelopment could  
317 have impact on the long-term brain structure, cognition, social-economic outcomes and mental  
318 well-being.

319

320 Motivated by the Group 3 GWAS results, we first calculated the PRS and *CENPW* score of  
321 delayed neurodevelopment for each participant in UK Biobank and then correlated them with  
322 outcomes of interest. Both PRS and *CENPW* score were approximately normally distributed and  
323 negatively associated with total GMV among this population (Fig. 5a). Next, we inspected the  
324 association of PRS and *CENPW* score with GMV in multiple brain regions in UK Biobank and  
325 found that inferior temporal, fusiform, middle temporal, medial orbitofrontal and lateral  
326 orbitofrontal areas were among the most correlated ROIs with PRS of delayed neurodevelopment,  
327 and lateral orbitofrontal, caudal middle frontal, rostral middle frontal, insula and superior frontal  
328 areas were among the most correlated ROIs with *CENPW* score (Fig. 5b and Supplementary  
329 Tables 13-14). These were consistent with the worse spatial working memory among participants  
330 with higher PRS of delayed neurodevelopment and *CENPW* score (Supplementary Table 15).  
331 Finally, we conducted non-superiority tests of the correlation coefficients and found that  
332 correlations between PRS of delayed neurodevelopment and *CENPW* score and all outcomes of  
333 interest were smaller than 0.05 (Fig. 5c and Supplementary Figs. 14-15). This indicated that  
334 although polygenic risks contributed to delayed neurodevelopment during adolescence, their  
335 long-term influences on the cognitive, mental health and socio-economic outcomes were limited  
336 once neurocognitive abilities were fully developed.

337

## 338 **Discussion**

339 Adolescence is a dynamic maturational period characterized by potentially suboptimal decision  
340 making and an amplified risk of behavioral problems due to the immature brain and cognitive  
341 abilities<sup>66-70</sup>. There is a growing consensus that adolescents have remarkably heterogeneous brain  
342 developmental patterns<sup>18</sup>. Therefore, studies at the population average level may obscure the true  
343 relationship between dynamic brain changes and risks for neuropsychiatric disorders. Here, we  
344 developed a data-driven approach that identified three groups of adolescents with distinct whole-  
345 brain neurodevelopmental patterns, and showed that these groups had associated genetic or  
346 epigenetic determinants, and could predict the paths of both neurocognitive development and  
347 long-term socio-economic attainments and mental well-being in mid-to-late adulthood.

348

349 Both neuroimaging and animal studies show that gray matter in higher-order brain regions  
350 undergoes continuous thinning during adolescence with synaptic pruning and

351 myelination<sup>25,28,71,72</sup>. Therefore, increasing gray matter during this period, especially in higher-  
352 order brain regions responsible for executive functions, is indicative of delayed brain maturation.  
353 Furthermore, a slower rate of gray matter thinning suggests reduced density of synapses and  
354 myelination<sup>3</sup>, which would further limit the enhancement of neurocognitive function and  
355 efficient information processing<sup>69,73,74</sup>. These diverse growth trajectories of the adolescent brain  
356 are capable of shifting both behaviors and the learning capabilities, in ways that could lead to  
357 life-long impacts<sup>70,75-77</sup>. Further, human brain development involves continuing and complex  
358 interactions between genetic and environmental influences<sup>23,26,78-83</sup>. By integrating genomic,  
359 neuroimaging, behavior and health-related data from three large-scale population cohorts, we  
360 confirmed that genetic variants are associated with delayed brain maturation and neurocognitive  
361 development, without affecting the socio-economic and mental well-being later in life. Whereas,  
362 adverse environmental exposure and the associated epigenetic changes could lead to prolonged  
363 negative effects on brain development and behavioral disadvantages. Importantly, we regard the  
364 differences between Group 2 and Group 1 as quantitative and subject to the magnitude of  
365 cumulative adverse environmental exposure, as reflected by the large overlap in their  
366 neurodevelopmental patterns and the relatively small effect sizes associated with adverse  
367 environmental factors. Consolidating results from EWAS and mediation analysis, our study shed  
368 light on the possible epigenetic and neurobiological mechanisms underlying potential causal  
369 pathways between environmental exposure and adolescent brain development. However, it does  
370 not necessarily mean that the differences between Group 3 and Group 1 could only be attributed  
371 to genetic variation, or that differences between Group 2 and Group 1 was purely due to  
372 environment. Future research with larger sample size and adequate statistical power are needed  
373 to elucidate the potential interplay between gene and environment on structural brain  
374 development.

375  
376 To our knowledge, this is the first attempt to investigate longitudinal brain development at the  
377 individual level and its associations with neurocognition and socio-economic outcomes  
378 persisting into late adulthood. The three population cohorts involved in our analyses were  
379 designed for relatively different purposes, in different populations and produced different data  
380 components. Although we tried to link the neurodevelopmental patterns from IMAGEN to  
381 ABCD and UK Biobank, this mapping using genetic and neuroimaging associations may subject

382 to confounding bias. For example, the bridging between IMAGEN and ABCD assumed a linear  
383 change of GMV from 9 years old (baseline age for the majority participants in ABCD) to 14  
384 years old (baseline age for the majority participants in IMAGEN), and homogenous population  
385 composition between these two cohorts. Given the findings from existing investigations (give a  
386 reference of brain chart), a linear trend of GMV from 9 to 14 years old were attainable, and in  
387 order to achieve population homogeneity, we only selected participants of self-reported “White”  
388 ethnicity in ABCD. In addition, both the appropriateness of using the proxy phenotype and  
389 results of GWAS conducted in ABCD were successfully validated. However, validation of our  
390 results, particularly the long-term impacts in mid-to-late adulthood, are required once long-term  
391 follow-ups of socio-economic outcomes in these adolescents become available. Further, the  
392 IMAGEN study involves healthy individuals only and our findings may have limited  
393 generalizability to specific disease populations. Although these adolescents were not diagnosed  
394 with specific neuropsychiatric disorders at baseline, they were likely to be present with  
395 subclinical symptoms, referred to minor neurological abnormalities or dysfunction seen in the  
396 absence of an obvious cause or pathology. Evidence indicated that subclinical symptoms seen in  
397 normal young children were partly attributable to immaturity of the nervous system and were  
398 frequently found in the clinical course of psychosis<sup>84</sup>, schizophrenia<sup>85</sup> and Alzheimer’s disease<sup>86</sup>.  
399 Neuroimaging studies thus stand as a powerful tool for identifying important brain regions and  
400 morphological phenotypes associated with subclinical symptoms, and for elucidating the  
401 neurobiological correlates of subclinical symptoms along the course of brain development.  
402 Finally, the three groups identified in this study constitute an initial attempt to solve the problem  
403 of heterogeneous brain development that relies heavily on the image-derived phenotypes  
404 obtained from sMRI. Further investigation using other neuroimaging modalities, or multi-modal  
405 phenotypes are needed for a comprehensive understanding of this dynamic process.

406

## 407 **Methods**

408 **Participants** Genomic, neuroimaging, environmental exposure, behavioral and mental health  
409 related data used to identify adolescent neurodevelopmental patterns were obtained from the  
410 IMAGEN study. Individuals with GMV beyond 4 interquartile ranges (IQRs) in any ROI were  
411 considered as outliers and were excluded from the analyses. After applying the exclusion criteria,  
412 1543 adolescents with at least two structural MRI scans from 14 to 23 years old were included in

413 the analyses (Supplementary Table 16). The average number of structural MRI scans per  
414 participant was 2.63, with 974 adolescents having a total of 3 scans (at 14, 19 and 23 years,  
415 respectively) and 569 adolescents having a total of 2 scans (384 at 14y and 19y, 147 at 14y and  
416 23y and 38 at 19y and 23y). In addition, genotyping data used in GWAS, validation of GWAS  
417 and investigation of the long-term impact were obtained from ABCD, IMAGEN and UK  
418 Biobank, respectively. A total of 11,760 participants aged between 9 and 11 years old from  
419 ABCD were included, with the average number of structural MRI scans per adolescent 1.68.  
420 Further, 502,409 participants aged between 37 and 73 years old from UK Biobank were included  
421 in the long-term analyses of structural brain development. Demographics and baseline  
422 characteristics of participants from the three large population cohorts were summarized in  
423 Supplementary Table 17. A full description of all population cohorts used in the analyses can be  
424 found in Supplementary Methods.

425

#### 426 **Analysis of Structural MRI data**

427 **Data preprocessing** In brief, quality-controlled processed T1-weighted neuroimaging data were  
428 obtained from ABCD, IMAGEN, Human Connectome Project Development (HCP-D), HCP  
429 Young Adult (HCP-YA) and the Philadelphia Neurodevelopmental Cohort (PNC). Assessment  
430 of regional morphometric structure were extracted by FreeSurfer v6.0 using Desikan-Killiany  
431 (h.aparc) atlas for cortical regions, and ASEG atlas for subcortical regions. Quality check was  
432 performed according to FreeSurfer reconstruction QC measures. Detailed description of data  
433 collection and preprocessing is provided in Supplementary Methods.

434

435 **Estimation of GMV developmental trajectory** GMV trajectory in each of the 44 ROIs was  
436 estimated for each adolescent using linear mixed effect regression model (*lme4* 1.1-31 package)  
437 (since at most three structural MRI scans were available for each adolescent, only random slope  
438 model could be robustly estimated). Empirical Bayes estimate of the random slope was extracted  
439 for each adolescent. Intracranial volume (ICV), sex, handedness and imaging site were used as  
440 covariates to adjust for potential confounding.

441

442 **Principal component analysis (PCA) and group clustering** Dimension reduction via PCA was  
443 performed to individual GMV trajectories estimated in the 44 ROIs. The first 15 principal

444 components (Supplementary Table 1), which explained 80% of the total variation, were used in  
445 the multivariate k-means clustering. The optimal number of clusters was selected based on  
446 Elbow method with the constraint that each cluster contain at least 4% of the overall population.

447  
448 **Permutation test** Permutation was conducted by shuffling the estimated GMV trajectory in each  
449 ROI simultaneously and re-performing the dimension reduction and multivariate clustering  
450 repeatedly over 1000 times. P value was calculated as the proportion of Between-cluster Sum of  
451 Squares / Total Sum of Squares ratio greater than the estimated ratio in the original sample  
452 across all 1000 permutations.

453  
454 **Comparison of GMV trajectory among groups** Pairwise comparisons of GMV developmental  
455 trajectories in each ROI among the three groups were conducted via t test. The top 5 ROIs with  
456 the largest absolute t values were selected as the top distinguishing ROIs between the  
457 corresponding groups (Supplementary Table 3). Cohen's ds (calculated using *effectsize* 0.8.3  
458 package) for these regions were provided in Fig. 1d and Supplementary Fig. 16.

459  
460 **Estimation of age and region-specific GMV development among groups** To illustrate the  
461 region-specific GMV development in an extended time frame ranging from late childhood to  
462 early adulthood, external neuroimaging data from several population cohorts were incorporated.  
463 This includes a total of 21,826 participants comprising of 11,811 participants aged 9-14y with  
464 19,587 scans in ABCD, 652 participants aged 5-22y in HCP-D, and 1,587 participants aged 8-  
465 23y in PNC study. Since cubic model could not capture GMV trajectory beyond 23y and  
466 quadratic model could not utilize data before 9y, we used a reference curve estimated from cross  
467 sectional studies (HCP-D + PNC) in estimating the region-specific GMV developmental curve  
468 over 5-25y. Distance between GMV in IMAGEN and that in the reference population in the  
469 corresponding ROI was used as the dependent variable in the quadratic linear mixed effect model  
470 with random intercept and slope, adjusting for ICV and site. Empirical Bayes estimates of the  
471 random effects for each group were added to the population averaged estimates to yield the  
472 group-specific developmental curve.

473

474 **Estimation of group-specific developmental curve of total GMV in IMAGEN** A two-stage  
475 estimating procedure was adopted. Optimal model was selected among a series of polynomial  
476 mixed effect models using likelihood ratio test. First, population ICV developmental curve over  
477 5-23y was estimated using the above-mentioned population neuroimaging data. Quadratic linear  
478 mixed effect models with random intercept at the individual and study level were fitted. To  
479 estimate the developmental curve of total GMV in the reference population (ABCD + HCP +  
480 PNC), cubic model adjusting for ICV was selected with random intercepts at the individual and  
481 study level. To estimate the developmental curve of total GMV in the ABCD and IMAGEN  
482 population, cubic model adjusting for ICV was selected with random intercept and slope at the  
483 individual level. Empirical Bayes estimates of the random effects were extracted and averaged in  
484 each group. Population ICV estimated in stage 1 was used to fit group-specific curves. The 5<sup>th</sup>  
485 and 95<sup>th</sup> percentile of the group-specific total GMV were calculated as the 95% confidence  
486 interval at each age.

487  
488 **Estimation of peak total GMV in IMAGEN** To estimate the peak total GMV in the IMAGEN  
489 population, 1,113 participants aged 22-38y in HCP-YA study were added to the reference  
490 population. A similar two-stage estimating procedure was used and the optimal model was  
491 selected based on Bayesian information criterion (BIC) and likelihood ratio test. First, population  
492 developmental curve of ICV was estimated using mixed effect regression model (*nlme* 3.1-160  
493 package) with random intercept and slope. Basis function involving centered age was determined  
494 as the natural spline with 5 degrees of freedom. Interaction effects between age and sex, sex and  
495 study were also included in the regression model. Estimated ICV at each age was retained for the  
496 following analysis. Next, linear mixed effect regression model with random intercept and slope  
497 was fitted for total GMV. Basis function involving centered age was determined to be B spline  
498 with 12 degrees of freedom. Interaction effects between age and sex, sex and study were  
499 included in the regression model. Peak total GMV was defined as the highest total GMV one can  
500 achieve during brain maturation.

501  
502 **Comparisons of environmental burden, neurocognition, behavior and mental disorder** To  
503 assess whether environmental burden, neurocognition, behavioral risk factors and mental  
504 symptoms differ by groups, we analyzed their longitudinal measurements at 14y, 16y, 19y and



505 23y in IMAGEN. Personal traits, including personality, temperament and characters, were  
506 obtained from the NEO Five-Factor Inventory (NEO-FFI) and temperament and character  
507 inventory (TCI-R). Environmental burden, including prenatal exposures (parental smoking,  
508 maternal drinking and maternal medical problems during pregnancy), birthweight, stressful life  
509 events, child trauma experiences, child's experience of family life and family stressors, were  
510 obtained from Pregnancy and Birth Questionnaire (PBQ), life-events questionnaire (LEQ),  
511 Childhood Trauma Questionnaire (CTQ), and Family Stress Scale and Family Life Questionnaire  
512 from development well-being assessment interview (DAWBA). Neurocognitive performances  
513 were obtained from Cambridge Neuropsychological Test Automated Battery (CANTAB) tests,  
514 Monetary-Choice Questionnaire (KIRBY) and Stop Signal Task (SST) results. Behavioral  
515 assessments, including conduct problems and substance use, were obtained from strengths and  
516 difficulties questionnaire (SDQ), European school survey project on alcohol and drugs (ESPAD),  
517 Fagerstrom test for nicotine dependence (FTND). Mental health conditions, including ADHD  
518 and depression, were obtained from self-rated development well-being assessment interview  
519 (DAWBA), where Attention-deficit/hyperactivity disorder (ADHD) score was additionally  
520 calculated using parent-rated interview. A detailed description of these assessment instruments is  
521 provided in Supplementary Methods. Generalized linear models adjusting for sex, handedness  
522 and ICV were used for comparing these tests at baseline and at the last follow-up visit (19y for  
523 Pattern recognition memory (PRM), Affective Go-No Go (AGN) and Rapid visual information  
524 processing (RVP); 23y for all other tests). For child-rated ADHD and depression score, baseline  
525 scores were also included as covariates. Intra-Extra Dimensional Set Shift (IED) test was only  
526 available at age 23y, and parent-rated ADHD score was only available at 14y and 16y. Cohen's d  
527 was calculated for each measurement after regressing out the covariates. False discovery rate  
528 (FDR) was used to correct for multiple testing within scales.

529  
530 **Quality control of genomic data** In this study, we performed stringent QC standards using  
531 PLINK 1.90. Individuals with > 10% missing rate and single-nucleotide polymorphisms (SNPs)  
532 with call rates < 95%, minor allele frequency < 0.1%, deviation from the Hardy-Weinberg  
533 equilibrium with  $P < 1E-10$  were excluded from the analysis. For ABCD, we only selected  
534 subjects with self-reporting White ancestral origins using the public release 3.0 imputed  
535 genotype data, which was imputed with the HRC reference panel<sup>87</sup>. Considering that ABCD is

536 oversampled for siblings and twins, we randomly selected one participant within each family.  
537 For IMAGEN, details about preprocessing of genomic data can be found in previous reports<sup>88</sup>  
538 and data was imputed with the HapMap3 reference panel<sup>89</sup>. For UKB, we selected subjects that  
539 were estimated to have recent British ancestry and have no more than ten putative third-degree  
540 relatives in the kinship table using the sample quality control information provided by UKB. For  
541 more details, please refer to the official document for genetic data of the UKB  
542 (<http://www.ukbiobank.ac.uk/scientists-3/genetic-data/>). After quality control, we obtained a  
543 total of 4,244,228 SNPs and 7,662 participants in ABCD, 5,966,316 SNPs and 1,982 participants  
544 in IMAGEN, and 616,339 SNPs and 337,199 participants in UKB.

545  
546 **Calculation of genetic liability** For each individual, polygenic risk scores (PRS) of ADHD,  
547 ASD, EA and IQ were calculated based on the public GWAS summary statistics<sup>51,90-92</sup> using  
548 PRSice v2.3.3. For ADHD, ASD and IQ, optimal p-value thresholds were determined based on  
549 the best-fit R<sup>2</sup> using parent-rated psychiatric scores for ADHD and ASD, and the total WISCIV  
550 score. For EA, variants were selected using a P value threshold from 5e-08 to 1 with a step of 5e-  
551 05 and an average score under each P value threshold was calculated.

552  
553 **GWAS and validation** Since it was difficult to estimate individual GMV developmental  
554 trajectory in ABCD with limited number of structural MRI scans per participant and limited age  
555 range, we calculated the group-reweighted GMV as a proxy phenotype. There are several  
556 underlying assumptions in this calculation. Firstly, it assumes that all brain regions exhibit a  
557 comparable linear change from childhood to adolescence. Secondly, it assumes that the  
558 participants from ABCD and IMAGEN are drawn from a homogeneous population. Once again,  
559 we only included individuals in ABCD with self-report White ancestral origins. ROI-specific  
560 loading contributing to group classification (Group 2 vs Group 1, Group 3 vs Group 1, Group 3  
561 vs Group 2, and Group 3 vs Groups 1/2) were obtained by regressing baseline GMV in 44 ROIs  
562 adjusting for age, sex, handedness and site in IMAGEN. Logistic regression model was used as  
563 the classification model and top 10 ROIs with the largest loadings were used to calculate the  
564 group-reweighted GMV in ABCD. Since results remained similar when comparing Group 3 vs  
565 Group 1 and when comparing Group 3 vs Group 2 (Supplementary Figs. 17-18), we combined  
566 Group 1 and 2 for increased statistical power, and performed the GWAS to investigate the

567 genetic variations associated with Group 3 vs Groups 1/2 (delayed brain development). GWAS  
568 was conducted in the White population adjusting for sex, scanner effect and top 20 PCA  
569 components using Plink 2 (Supplementary Fig. 19). To ensure the validity of group reweighted  
570 phenotype, we correlated the Group-3 reweighted GMV and neurocognitive assessments (Game  
571 of Dice Task, Delay Discounting Task and NIH Toolbox) in ABCD (Supplementary Methods).  
572 Gene-based association analysis was conducted via MAGMA (version 1.10) using raw genomics  
573 data with the same covariate adjustment. To validate the GWAS results, polygenic risk scores for  
574 SNPs residing in CENPW (referred to as CENPW score) and across the whole genome (referred  
575 to as PRS) were calculated. Four SNPs were obtained by clumping within 250 kb upstream and  
576 downstream of CENPW (chr6:126339789-126483320) using Plink 2. PRS was calculated using  
577 PRSice using the most predictive P threshold for group-reweighted baseline GMV ( $r=0.06$ ,  
578  $P=0.033$ ). Distribution of PRS between Group 3 vs Groups 1/2 and correlation coefficients  
579 between PRS and neurocognition, behavior and mental disorder at age 14y and 23y were  
580 obtained. FDR was used for multiple tests correction within scales.

581  
582 **EWAS, gene-specific methylation analysis and results validation.** EWAS was performed  
583 among 909 adolescents in Group 1 and Group 2 in IMAGEN. Methylation data were collected  
584 using the Illumina Infinium HumanMethylation450 BeadChip. Locus-specific genome-wide  
585 methylation analysis was conducted and beta values at each Autosomal CpG site between groups  
586 was compared using logistic regression adjusting for sex, experimental batches (recruitment  
587 center and acquisition wave), the first two principal components of methylation composition and  
588 the first four principal components of estimated differential cell counts. Statistical significance  
589 was set as false discovery rate (FDR) adjusted p-value  $< 0.05$ . Next, we aimed to investigate the  
590 association between CpG site and gene methylation with environmental factors of interest. We  
591 conducted mediation analyses (*sem* function in the *lavaan* 0.6-12 package) and estimated the  
592 total effect of childhood experiences on estimated peak GMV and the indirect effect mediated by  
593 cg06064461 hypermethylation. Sex, batches effects, methylation composition components and  
594 differential cell count components were included as covariates. Total, direct and indirect effect  
595 and their standard deviations were estimated using 1000-iterated nonparametric bootstrap  
596 approach. False discovery rate (FDR) was used to correct for multiple testing within scales.

597

598 **Long-term impacts of neurodevelopment in UK Biobank** Socio-economic, cognitive and  
599 mental health outcomes were obtained at baseline visit among participants in UK Biobank.  
600 Socioeconomic conditions were assessed by household income, jobs involved in physical activity  
601 and Indices of Multiple Deprivation (IMD) (education, employment and income scores).  
602 Cognition was assessed by fluid intelligence and the highest educational attainment. The  
603 educational level was divided into four ordinal categories: (1) College or University degree; (2)  
604 A levels/AS levels, NVQ or HND or HNC, other professional qualifications or equivalent; (3) O  
605 levels/GCSEs, CSEs or equivalent; (4) None of the above. Mental health was assessed by  
606 diagnosis of mental disorders (anxiety, depression and mania), summary score of neuroticism  
607 and self-reported mental symptom appearances. A detailed description of assessment instruments  
608 used in the analysis can be found in Supplementary Methods. To estimate the long-term effect of  
609 delayed neurodevelopment, we calculated CENPW score and RPS according to the results of  
610 Group 3 GWAS and correlated these scores with outcomes of interest after regressing out the age  
611 effect at recruitment, site and gender. It should be noted that these scores only reflect a genetic  
612 predicted risk for delayed brain development. Given the large age gap between participants in  
613 UK Biobank and IMAGEN, it is challenging to disentangle the long-term impacts of  
614 neurodevelopment from those due to potential environmental confounding in mid-to-late  
615 adulthood. Therefore, this analysis only serves to explore the potential long-term influence of  
616 genetically predicted delayed neurodevelopment and does not account for potential confounding  
617 due to environmental factors. Similarly, we assume the homogeneity of study populations  
618 between IMAGEN and UK Biobank. For PRS calculation, we used P value thresholds from 5E-  
619 08 to 1 with a step of 5E-05 and calculated an average PRS score for each individual. Due to the  
620 large sample size and easily-obtainable statistical significance, inferiority tests against 0.05 were  
621 conducted against the null hypothesis that the absolute correlation coefficient was less than 0.05.

622

### 623 **Data availability**

624 Data from the ABCD study are available from a dedicated database: <https://abcdstudy.org/> by  
625 application; data from the IMAGEN study are available upon application: <https://imagen2.cea.fr/>;  
626 HCP data are available from: <https://www.humanconnectome.org/> by application; PNC data are  
627 available from dbGaP: [https://www.ncbi.nlm.nih.gov/projects/gap/cgi-](https://www.ncbi.nlm.nih.gov/projects/gap/cgi-bin/study.cgi?study_id=phs000607.v3.p2)  
628 [bin/study.cgi?study\\_id=phs000607.v3.p2](https://www.ncbi.nlm.nih.gov/projects/gap/cgi-bin/study.cgi?study_id=phs000607.v3.p2) by application; and UKB data are available from

629 <https://biobank.ndph.ox.ac.uk/> by application ID 19542. Summary statistics from published  
630 GWAS of ADHD, ASD, EA and IQ are available at <https://atlas.ctglab.nl/>. Summary statistics of  
631 the GWAS for delayed brain development in this study will be uploaded to <https://atlas.ctglab.nl/>  
632 upon publication.

633

#### 634 **Code availability**

635 Primary analyses were conducted in R v4.2.2. Linear mixed effect models were performed using  
636 *lme4* 1.1-31 and *nlme* 3.1-160 R packages. Mediation analysis was performed using *lavaan* 0.6-  
637 12 R package. PLINK 2.0 was used to perform GWAS and calculate *CENPW* score. MAGMA  
638 v1.10 was used to perform the gene-based association analysis. PRSice v2.3.3 was used to  
639 calculate the PRS. Custom code that supports the main findings of this study will be available  
640 <https://github.com/abnmsry>. Additional information related to this paper are available from the  
641 authors upon reasonable request.

642

#### 643 **Reference**

644

- 645 1 Giedd, J. N. *et al.* Brain development during childhood and adolescence: a longitudinal  
646 MRI study. *Nat Neurosci* **2**, 861-863, doi:10.1038/13158 (1999).
- 647 2 Lenroot, R. K. & Giedd, J. N. Brain development in children and adolescents: insights  
648 from anatomical magnetic resonance imaging. *Neurosci Biobehav Rev* **30**, 718-729,  
649 doi:10.1016/j.neubiorev.2006.06.001 (2006).
- 650 3 Tamnes, C. K. *et al.* Development of the Cerebral Cortex across Adolescence: A  
651 Multisample Study of Inter-Related Longitudinal Changes in Cortical Volume, Surface  
652 Area, and Thickness. *J Neurosci* **37**, 3402-3412, doi:10.1523/JNEUROSCI.3302-16.2017  
653 (2017).
- 654 4 Paus, T., Keshavan, M. & Giedd, J. N. Why do many psychiatric disorders emerge during  
655 adolescence? *Nat Rev Neurosci* **9**, 947-957, doi:10.1038/nrn2513 (2008).
- 656 5 Lee, F. S. *et al.* Adolescent mental health-Opportunity and obligation. **346**, 547-549,  
657 doi:doi:10.1126/science.1260497 (2014).
- 658 6 Blakemore, S. J. Adolescence and mental health. *Lancet* **393**, 2030-2031,  
659 doi:10.1016/S0140-6736(19)31013-X (2019).
- 660 7 Gunnell, D., Kidger, J. & Elvidge, H. Adolescent mental health in crisis. *BMJ* **361**, k2608,  
661 doi:10.1136/bmj.k2608 (2018).
- 662 8 Haier, R. J., Jung, R. E., Yeo, R. A., Head, K. & Alkire, M. T. Structural brain variation  
663 and general intelligence. *Neuroimage* **23**, 425-433,  
664 doi:10.1016/j.neuroimage.2004.04.025 (2004).
- 665 9 Shaw, P. *et al.* Attention-deficit/hyperactivity disorder is characterized by a delay in  
666 cortical maturation. *Proc Natl Acad Sci U S A* **104**, 19649-19654,  
667 doi:10.1073/pnas.0707741104 (2007).

- 668 10 Shaw, P. *et al.* Intellectual ability and cortical development in children and adolescents.  
669 *Nature* **440**, 676-679, doi:10.1038/nature04513 (2006).
- 670 11 Giedd, J. N. & Rapoport, J. L. Structural MRI of pediatric brain development: what have  
671 we learned and where are we going? *Neuron* **67**, 728-734,  
672 doi:10.1016/j.neuron.2010.08.040 (2010).
- 673 12 Ramsden, S. *et al.* Verbal and non-verbal intelligence changes in the teenage brain.  
674 *Nature* **479**, 113-116, doi:10.1038/nature10514 (2011).
- 675 13 Schnack, H. G. *et al.* Accelerated Brain Aging in Schizophrenia: A Longitudinal Pattern  
676 Recognition Study. *Am J Psychiatry* **173**, 607-616, doi:10.1176/appi.ajp.2015.15070922  
677 (2016).
- 678 14 Bos, M. G. N., Peters, S., van de Kamp, F. C., Crone, E. A. & Tamnes, C. K. Emerging  
679 depression in adolescence coincides with accelerated frontal cortical thinning. *J Child*  
680 *Psychol Psychiatry* **59**, 994-1002, doi:10.1111/jcpp.12895 (2018).
- 681 15 Baum, G. L. *et al.* Development of structure-function coupling in human brain networks  
682 during youth. *Proc Natl Acad Sci U S A* **117**, 771-778, doi:10.1073/pnas.1912034117  
683 (2020).
- 684 16 Sakai, J. Core Concept: How synaptic pruning shapes neural wiring during development  
685 and, possibly, in disease. *Proc Natl Acad Sci U S A* **117**, 16096-16099,  
686 doi:10.1073/pnas.2010281117 (2020).
- 687 17 Hedman, A. M., van Haren, N. E., Schnack, H. G., Kahn, R. S. & Hulshoff Pol, H. E.  
688 Human brain changes across the life span: a review of 56 longitudinal magnetic  
689 resonance imaging studies. *Hum Brain Mapp* **33**, 1987-2002, doi:10.1002/hbm.21334  
690 (2012).
- 691 18 Foulkes, L. & Blakemore, S. J. Studying individual differences in human adolescent  
692 brain development. *Nat Neurosci* **21**, 315-323, doi:10.1038/s41593-018-0078-4 (2018).
- 693 19 Mills, K. L. *et al.* Inter-individual variability in structural brain development from late  
694 childhood to young adulthood. *Neuroimage* **242**, 118450,  
695 doi:10.1016/j.neuroimage.2021.118450 (2021).
- 696 20 Sisk, C. L. & Foster, D. L. The neural basis of puberty and adolescence. *Nat Neurosci* **7**,  
697 1040-1047, doi:10.1038/nn1326 (2004).
- 698 21 Gogtay, N. *et al.* Dynamic mapping of human cortical development during childhood  
699 through early adulthood. *Proc Natl Acad Sci U S A* **101**, 8174-8179,  
700 doi:10.1073/pnas.0402680101 (2004).
- 701 22 Sowell, E. R. *et al.* Mapping cortical change across the human life span. *Nat Neurosci* **6**,  
702 309-315, doi:10.1038/nn1008 (2003).
- 703 23 Noble, K. G. *et al.* Family income, parental education and brain structure in children and  
704 adolescents. *Nat Neurosci* **18**, 773-778, doi:10.1038/nn.3983 (2015).
- 705 24 Rosenberg, M. D. *et al.* A neuromarker of sustained attention from whole-brain  
706 functional connectivity. *Nat Neurosci* **19**, 165-171, doi:10.1038/nn.4179 (2016).
- 707 25 Mills, K. L. *et al.* Structural brain development between childhood and adulthood:  
708 Convergence across four longitudinal samples. *Neuroimage* **141**, 273-281,  
709 doi:10.1016/j.neuroimage.2016.07.044 (2016).
- 710 26 Brouwer, R. M. *et al.* Genetic variants associated with longitudinal changes in brain  
711 structure across the lifespan. *Nat Neurosci* **25**, 421-432, doi:10.1038/s41593-022-01042-4  
712 (2022).

- 713 27 Deary, I. J. *et al.* Genetic contributions to stability and change in intelligence from  
714 childhood to old age. *Nature* **482**, 212-215, doi:10.1038/nature10781 (2012).
- 715 28 Bethlehem, R. A. I. *et al.* Brain charts for the human lifespan. *Nature* **604**, 525-533,  
716 doi:10.1038/s41586-022-04554-y (2022).
- 717 29 Jack, C. R., Jr. *et al.* Tracking pathophysiological processes in Alzheimer's disease: an  
718 updated hypothetical model of dynamic biomarkers. *Lancet Neurol* **12**, 207-216,  
719 doi:10.1016/S1474-4422(12)70291-0 (2013).
- 720 30 Abi-Dargham, A. & Horga, G. The search for imaging biomarkers in psychiatric  
721 disorders. *Nat Med* **22**, 1248-1255, doi:10.1038/nm.4190 (2016).
- 722 31 Schmaal, L. *et al.* Cortical abnormalities in adults and adolescents with major depression  
723 based on brain scans from 20 cohorts worldwide in the ENIGMA Major Depressive  
724 Disorder Working Group. *Mol Psychiatry* **22**, 900-909, doi:10.1038/mp.2016.60 (2017).
- 725 32 Radua, J. *et al.* Ventral Striatal Activation During Reward Processing in Psychosis: A  
726 Neurofunctional Meta-Analysis. *JAMA Psychiatry* **72**, 1243-1251,  
727 doi:10.1001/jamapsychiatry.2015.2196 (2015).
- 728 33 Mayberg, H. S. *et al.* Reciprocal limbic-cortical function and negative mood: converging  
729 PET findings in depression and normal sadness. *Am J Psychiatry* **156**, 675-682,  
730 doi:10.1176/ajp.156.5.675 (1999).
- 731 34 Shafee, R., Buckner, R. L. & Fischl, B. Gray matter myelination of 1555 human brains  
732 using partial volume corrected MRI images. *Neuroimage* **105**, 473-485,  
733 doi:10.1016/j.neuroimage.2014.10.054 (2015).
- 734 35 Corrigan, N. M. *et al.* Myelin development in cerebral gray and white matter during  
735 adolescence and late childhood. *Neuroimage* **227**, 117678,  
736 doi:10.1016/j.neuroimage.2020.117678 (2021).
- 737 36 Zatorre, R. J., Fields, R. D. & Johansen-Berg, H. Plasticity in gray and white:  
738 neuroimaging changes in brain structure during learning. *Nat Neurosci* **15**, 528-536,  
739 doi:10.1038/nn.3045 (2012).
- 740 37 Schmidt, S. *et al.* Experience-dependent structural plasticity in the adult brain: How the  
741 learning brain grows. *Neuroimage* **225**, 117502, doi:10.1016/j.neuroimage.2020.117502  
742 (2021).
- 743 38 Whitaker, K. J. *et al.* Adolescence is associated with genomically patterned consolidation  
744 of the hubs of the human brain connectome. *Proc Natl Acad Sci U S A* **113**, 9105-9110,  
745 doi:10.1073/pnas.1601745113 (2016).
- 746 39 Mascarell Maricic, L. *et al.* The IMAGEN study: a decade of imaging genetics in  
747 adolescents. *Mol Psychiatry* **25**, 2648-2671, doi:10.1038/s41380-020-0822-5 (2020).
- 748 40 Hori, T. *et al.* CCAN makes multiple contacts with centromeric DNA to provide distinct  
749 pathways to the outer kinetochore. *Cell* **135**, 1039-1052, doi:10.1016/j.cell.2008.10.019  
750 (2008).
- 751 41 Nishino, T. *et al.* CENP-T-W-S-X forms a unique centromeric chromatin structure with a  
752 histone-like fold. *Cell* **148**, 487-501, doi:10.1016/j.cell.2011.11.061 (2012).
- 753 42 Aygun, N. *et al.* Brain-trait-associated variants impact cell-type-specific gene regulation  
754 during neurogenesis. *Am J Hum Genet* **108**, 1647-1668, doi:10.1016/j.ajhg.2021.07.011  
755 (2021).
- 756 43 Zhao, B. *et al.* Genome-wide association analysis of 19,629 individuals identifies variants  
757 influencing regional brain volumes and refines their genetic co- architecture with

- 758 cognitive and mental health traits. *Nat Genet* **51**, 1637-1644, doi:10.1038/s41588-019-  
759 0516-6 (2019).
- 760 44 Shin, J. *et al.* Global and Regional Development of the Human Cerebral Cortex:  
761 Molecular Architecture and Occupational Aptitudes. *Cereb Cortex* **30**, 4121-4139,  
762 doi:10.1093/cercor/bhaa035 (2020).
- 763 45 Grasby, K. L. *et al.* The genetic architecture of the human cerebral cortex. *Science* **367**,  
764 doi:10.1126/science.aay6690 (2020).
- 765 46 Hofer, E. *et al.* Genetic correlations and genome-wide associations of cortical structure in  
766 general population samples of 22,824 adults. *Nat Commun* **11**, 4796,  
767 doi:10.1038/s41467-020-18367-y (2020).
- 768 47 van der Meer, D. *et al.* Understanding the genetic determinants of the brain with  
769 MOSTest. *Nat Commun* **11**, 3512, doi:10.1038/s41467-020-17368-1 (2020).
- 770 48 van der Meer, D. *et al.* The genetic architecture of human cortical folding. *Sci Adv* **7**,  
771 eabj9446, doi:10.1126/sciadv.abj9446 (2021).
- 772 49 Davies, G. *et al.* Study of 300,486 individuals identifies 148 independent genetic loci  
773 influencing general cognitive function. *Nat Commun* **9**, 2098, doi:10.1038/s41467-018-  
774 04362-x (2018).
- 775 50 Hill, W. D. *et al.* A combined analysis of genetically correlated traits identifies 187 loci  
776 and a role for neurogenesis and myelination in intelligence. *Mol Psychiatry* **24**, 169-181,  
777 doi:10.1038/s41380-017-0001-5 (2019).
- 778 51 Lee, J. J. *et al.* Gene discovery and polygenic prediction from a genome-wide association  
779 study of educational attainment in 1.1 million individuals. *Nat Genet* **50**, 1112-1121,  
780 doi:10.1038/s41588-018-0147-3 (2018).
- 781 52 Gudbjartsson, D. F. *et al.* Many sequence variants affecting diversity of adult human  
782 height. *Nat Genet* **40**, 609-615, doi:10.1038/ng.122 (2008).
- 783 53 Berndt, S. I. *et al.* Genome-wide meta-analysis identifies 11 new loci for anthropometric  
784 traits and provides insights into genetic architecture. *Nat Genet* **45**, 501-512,  
785 doi:10.1038/ng.2606 (2013).
- 786 54 van der Valk, R. J. *et al.* A novel common variant in DCST2 is associated with length in  
787 early life and height in adulthood. *Human molecular genetics* **24**, 1155-1168,  
788 doi:10.1093/hmg/ddu510 (2015).
- 789 55 Shungin, D. *et al.* New genetic loci link adipose and insulin biology to body fat  
790 distribution. *Nature* **518**, 187-196, doi:10.1038/nature14132 (2015).
- 791 56 Tachmazidou, I. *et al.* Whole-Genome Sequencing Coupled to Imputation Discovers  
792 Genetic Signals for Anthropometric Traits. *Am J Hum Genet* **100**, 865-884,  
793 doi:10.1016/j.ajhg.2017.04.014 (2017).
- 794 57 Pearson, A. G., Curtis, M. A., Waldvogel, H. J., Faull, R. L. & Dragunow, M. Activating  
795 transcription factor 2 expression in the adult human brain: association with both  
796 neurodegeneration and neurogenesis. *Neuroscience* **133**, 437-451,  
797 doi:10.1016/j.neuroscience.2005.02.029 (2005).
- 798 58 Suzuki, T., Yamakuni, T., Hagiwara, M. & Ichinose, H. Identification of ATF-2 as a  
799 transcriptional regulator for the tyrosine hydroxylase gene. *J Biol Chem* **277**, 40768-  
800 40774, doi:10.1074/jbc.M206043200 (2002).
- 801 59 Watson, G., Ronai, Z. A. & Lau, E. ATF2, a paradigm of the multifaceted regulation of  
802 transcription factors in biology and disease. *Pharmacol Res* **119**, 347-357,  
803 doi:10.1016/j.phrs.2017.02.004 (2017).



- 804 60 Islam, A., Mohammad, E. & Khan, M. A. Aberration of the modulatory functions of  
805 intronic microRNA hsa-miR-933 on its host gene ATF2 results in type II diabetes  
806 mellitus and neurodegenerative disease development. *Hum Genomics* **14**, 34,  
807 doi:10.1186/s40246-020-00285-1 (2020).
- 808 61 Bellina, M. *et al.* Relationship between parenting measures and parents and child  
809 psychopathological symptoms: a cross-sectional study. *BMC Psychiatry* **20**, 377,  
810 doi:10.1186/s12888-020-02778-8 (2020).
- 811 62 Hagenaars, S. P. *et al.* Shared genetic aetiology between cognitive functions and physical  
812 and mental health in UK Biobank (N=112 151) and 24 GWAS consortia. *Mol Psychiatry*  
813 **21**, 1624-1632, doi:10.1038/mp.2015.225 (2016).
- 814 63 Hagenaars, S. P. *et al.* Genetic contributions to Trail Making Test performance in UK  
815 Biobank. *Mol Psychiatry* **23**, 1575-1583, doi:10.1038/mp.2017.189 (2018).
- 816 64 Warriar, V. *et al.* Gene-environment correlations and causal effects of childhood  
817 maltreatment on physical and mental health: a genetically informed approach. *Lancet*  
818 *Psychiatry* **8**, 373-386, doi:10.1016/S2215-0366(20)30569-1 (2021).
- 819 65 Hughes, K. *et al.* The effect of multiple adverse childhood experiences on health: a  
820 systematic review and meta-analysis. *Lancet Public Health* **2**, e356-e366,  
821 doi:10.1016/S2468-2667(17)30118-4 (2017).
- 822 66 Sawyer, S. M. *et al.* Adolescence: a foundation for future health. *Lancet* **379**, 1630-1640,  
823 doi:10.1016/S0140-6736(12)60072-5 (2012).
- 824 67 World Health, O. (World Health Organization, Geneva, 2001).
- 825 68 Worthman, C. M. & Trang, K. Dynamics of body time, social time and life history at  
826 adolescence. *Nature* **554**, 451-457, doi:10.1038/nature25750 (2018).
- 827 69 Hensch, T. K. Critical period plasticity in local cortical circuits. *Nat Rev Neurosci* **6**, 877-  
828 888, doi:10.1038/nrn1787 (2005).
- 829 70 Gopnik, A. *et al.* Changes in cognitive flexibility and hypothesis search across human life  
830 history from childhood to adolescence to adulthood. *Proc Natl Acad Sci U S A* **114**, 7892-  
831 7899, doi:10.1073/pnas.1700811114 (2017).
- 832 71 Drzewiecki, C. M., Willing, J. & Juraska, J. M. Synaptic number changes in the medial  
833 prefrontal cortex across adolescence in male and female rats: A role for pubertal onset.  
834 *Synapse* **70**, 361-368, doi:10.1002/syn.21909 (2016).
- 835 72 Petanjek, Z. *et al.* Extraordinary neoteny of synaptic spines in the human prefrontal  
836 cortex. *Proc Natl Acad Sci U S A* **108**, 13281-13286, doi:10.1073/pnas.1105108108  
837 (2011).
- 838 73 Zuo, Y., Lin, A., Chang, P. & Gan, W. B. Development of long-term dendritic spine  
839 stability in diverse regions of cerebral cortex. *Neuron* **46**, 181-189,  
840 doi:10.1016/j.neuron.2005.04.001 (2005).
- 841 74 Gogolla, N., Caroni, P., Luthi, A. & Herry, C. Perineuronal nets protect fear memories  
842 from erasure. *Science* **325**, 1258-1261, doi:10.1126/science.1174146 (2009).
- 843 75 Davidow, J. Y., Foerde, K., Galvan, A. & Shohamy, D. An Upside to Reward Sensitivity:  
844 The Hippocampus Supports Enhanced Reinforcement Learning in Adolescence. *Neuron*  
845 **92**, 93-99, doi:10.1016/j.neuron.2016.08.031 (2016).
- 846 76 van den Bos, W., Cohen, M. X., Kahnt, T. & Crone, E. A. Striatum-medial prefrontal  
847 cortex connectivity predicts developmental changes in reinforcement learning. *Cereb*  
848 *Cortex* **22**, 1247-1255, doi:10.1093/cercor/bhr198 (2012).

- 849 77 Hauser, T. U., Iannaccone, R., Walitza, S., Brandeis, D. & Brem, S. Cognitive flexibility  
850 in adolescence: neural and behavioral mechanisms of reward prediction error processing  
851 in adaptive decision making during development. *Neuroimage* **104**, 347-354,  
852 doi:10.1016/j.neuroimage.2014.09.018 (2015).
- 853 78 Ernst, M., Moolchan, E. T. & Robinson, M. L. Behavioral and neural consequences of  
854 prenatal exposure to nicotine. *J Am Acad Child Adolesc Psychiatry* **40**, 630-641,  
855 doi:10.1097/00004583-200106000-00007 (2001).
- 856 79 Bookstein, F. L., Streissguth, A. P., Sampson, P. D., Connor, P. D. & Barr, H. M. Corpus  
857 callosum shape and neuropsychological deficits in adult males with heavy fetal alcohol  
858 exposure. *Neuroimage* **15**, 233-251, doi:10.1006/nimg.2001.0977 (2002).
- 859 80 Sowell, E. R. *et al.* Abnormal cortical thickness and brain-behavior correlation patterns in  
860 individuals with heavy prenatal alcohol exposure. *Cereb Cortex* **18**, 136-144,  
861 doi:10.1093/cercor/bhm039 (2008).
- 862 81 Lees, B. *et al.* Association of Prenatal Alcohol Exposure With Psychological, Behavioral,  
863 and Neurodevelopmental Outcomes in Children From the Adolescent Brain Cognitive  
864 Development Study. *Am J Psychiatry* **177**, 1060-1072,  
865 doi:10.1176/appi.ajp.2020.20010086 (2020).
- 866 82 Bublitz, M. H. & Stroud, L. R. Childhood sexual abuse is associated with cortisol  
867 awakening response over pregnancy: preliminary findings. *Psychoneuroendocrinology* **37**,  
868 1425-1430, doi:10.1016/j.psyneuen.2012.01.009 (2012).
- 869 83 Roussotte, F. F. *et al.* Regional brain volume reductions relate to facial dysmorphology  
870 and neurocognitive function in fetal alcohol spectrum disorders. *Hum Brain Mapp* **33**,  
871 920-937, doi:10.1002/hbm.21260 (2012).
- 872 84 Dazzan, P. & Murray, R. M. Neurological soft signs in first-episode psychosis: a  
873 systematic review. *Br J Psychiatry Suppl* **43**, s50-57, doi:10.1192/bjp.181.43.s50 (2002).
- 874 85 Schroder, J. & Toro, P. Neurological soft signs predict outcomes in schizophrenia. *Nat*  
875 *Rev Neurol* **16**, 659-660, doi:10.1038/s41582-020-0403-x (2020).
- 876 86 Seidl, U., Thomann, P. A. & Schroder, J. Neurological soft signs in nursing home  
877 residents with Alzheimer's disease. *J Alzheimers Dis* **18**, 525-532, doi:10.3233/JAD-  
878 2009-1159 (2009).
- 879 87 McCarthy, S. *et al.* A reference panel of 64,976 haplotypes for genotype imputation. *Nat*  
880 *Genet* **48**, 1279-1283, doi:10.1038/ng.3643 (2016).
- 881 88 Luo, Q. *et al.* Association of a Schizophrenia-Risk Nonsynonymous Variant With  
882 Putamen Volume in Adolescents: A Voxelwise and Genome-Wide Association Study.  
883 *JAMA Psychiatry* **76**, 435-445, doi:10.1001/jamapsychiatry.2018.4126 (2019).
- 884 89 International HapMap, C. *et al.* Integrating common and rare genetic variation in diverse  
885 human populations. *Nature* **467**, 52-58, doi:10.1038/nature09298 (2010).
- 886 90 Demontis, D. *et al.* Discovery of the first genome-wide significant risk loci for attention  
887 deficit/hyperactivity disorder. *Nat Genet* **51**, 63-75, doi:10.1038/s41588-018-0269-7  
888 (2019).
- 889 91 Grove, J. *et al.* Identification of common genetic risk variants for autism spectrum  
890 disorder. *Nat Genet* **51**, 431-444, doi:10.1038/s41588-019-0344-8 (2019).
- 891 92 Savage, J. E. *et al.* Genome-wide association meta-analysis in 269,867 individuals  
892 identifies new genetic and functional links to intelligence. *Nat Genet* **50**, 912-919,  
893 doi:10.1038/s41588-018-0152-6 (2018).
- 894

895  
896  
897  
898  
899  
900  
901  
902  
903  
904  
905  
906  
907  
908  
909  
910  
911  
912  
913  
914  
915  
916  
917  
918  
919  
920  
921  
922  
923  
924  
925  
926

**Acknowledgments and funding:** This work received support from the following sources:  
National Key R&D Program of China (No.2019YFA0709502), National Key R&D Program of  
China (No.2018YFC1312904), Shanghai Municipal Science and Technology Major Project  
(No.2018SHZDZX01), ZJ Lab, and Shanghai Center for Brain Science and Brain-Inspired  
Technology, the 111 Project (No.B18015), the European Union-funded FP6 Integrated Project  
IMAGEN (Reinforcement-related behaviour in normal brain function and psychopathology)  
(LSHM-CT- 2007-037286), the Horizon 2020 funded ERC Advanced Grant ‘STRATIFY’  
(Brain network based stratification of reinforcement-related disorders) (695313), Human Brain  
Project (HBP SGA 2, 785907, and HBP SGA 3, 945539), the Medical Research Council Grant  
'c-VEDA' (Consortium on Vulnerability to Externalizing Disorders and Addictions)  
(MR/N000390/1), the National Institute of Health (NIH) (R01DA049238, A decentralized macro  
and micro gene-by-environment interaction analysis of substance use behavior and its brain  
biomarkers), the National Institute for Health Research (NIHR) Biomedical Research Centre at  
South London and Maudsley NHS Foundation Trust and King’s College London, the  
Bundesministerium für Bildung und Forschung (BMBF grants 01GS08152; 01EV0711;  
Forschungsnetz AERIAL 01EE1406A, 01EE1406B; Forschungsnetz IMAC-Mind 01GL1745B),  
the Deutsche Forschungsgemeinschaft (DFG grants SM 80/7-2, SFB 940, TRR 265, NE  
1383/14-1), the Medical Research Foundation and Medical Research Council (grants  
MR/R00465X/1 and MR/S020306/1), the National Institutes of Health (NIH) funded ENIGMA  
(grants 5U54EB020403-05 and 1R56AG058854-01), NSFC grant 82150710554 and  
environMENTAL grant. Further support was provided by grants from: - the ANR (ANR-12-  
SAMA-0004, AAPG2019 - GeBra), the Eranet Neuron (AF12-NEUR0008-01 - WM2NA; and  
ANR-18-NEUR00002-01 - ADORe), the Fondation de France (00081242), the Fondation pour la  
Recherche Médicale (DPA20140629802), the Mission Interministérielle de Lutte-contre-les-  
Drogues-et-les-Conduites-Addictives (MILDECA), the Assistance-Publique-Hôpitaux-de-Paris  
and INSERM (interface grant), Paris Sud University IDEX 2012, the Fondation de l’Avenir  
(grant AP-RM-17-013 ), the Fédération pour la Recherche sur le Cerveau; the National Institutes  
of Health, Science Foundation Ireland (16/ERCD/3797), U.S.A. (Axon, Testosterone and Mental

927 Health during Adolescence; RO1 MH085772-01A1) and by NIH Consortium grant U54  
928 EB020403, supported by a cross-NIH alliance that funds Big Data to Knowledge Centres of  
929 Excellence. The funders had no role in study design, data collection and analysis, decision to  
930 publish or preparation of the manuscript.

931 **Competing Interests:** Dr Banaschewski served in an advisory or consultancy role for Lundbeck,  
932 Medice, Neurim Pharmaceuticals, Oberberg GmbH, Shire. He received conference support or  
933 speaker's fee by Lilly, Medice, Novartis and Shire. He has been involved in clinical trials  
934 conducted by Shire & Viforpharma. He received royalties from Hogrefe, Kohlhammer, CIP  
935 Medien, Oxford University Press. The present work is unrelated to the above grants and  
936 relationships. Dr Barker receives honoraria for teaching from GE Healthcare. Dr Poustka served  
937 in an advisory or consultancy role for Roche and Viforpharm and received speaker's fee by Shire.  
938 She received royalties from Hogrefe, Kohlhammer and Schattauer. The present work is unrelated  
939 to the above grants and relationships. The other authors report no biomedical financial interests  
940 or potential conflicts of interest.

## a IMAGEN longitudinal study: n=1,543

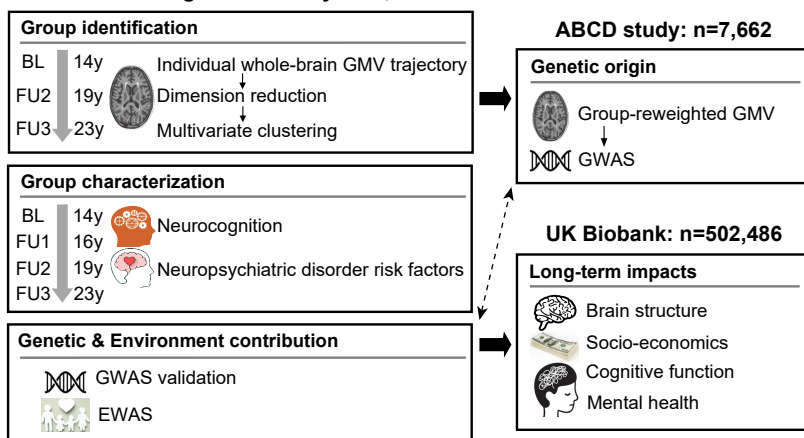

## c

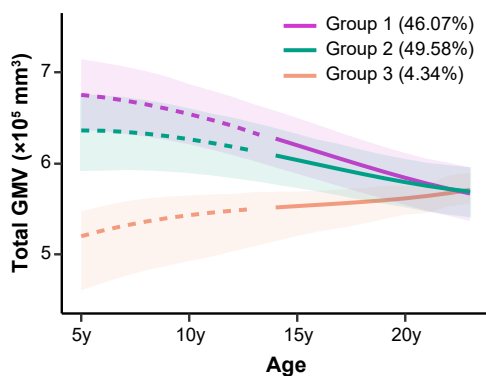

## b

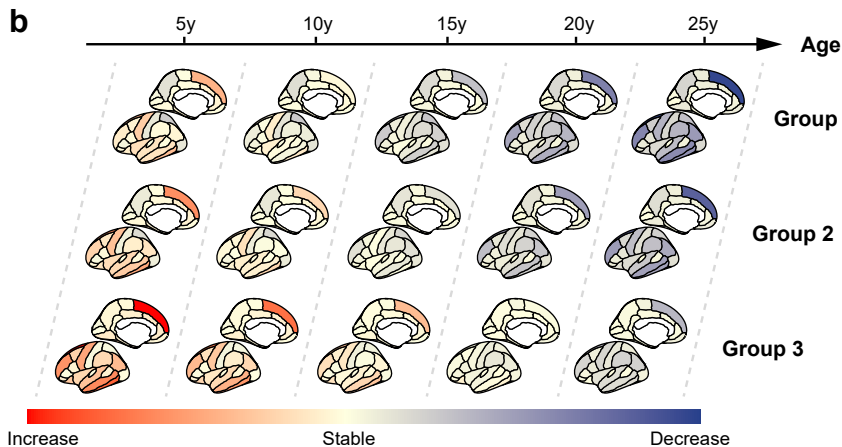

## d

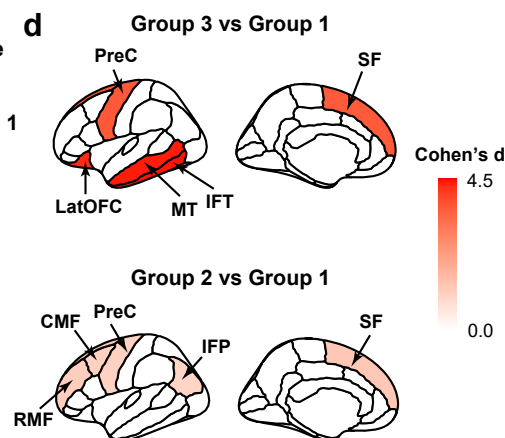

### Fig. 1 Whole-brain gray matter volume (GMV) developmental patterns define three neurodevelopmental groups.

**(a)** Schematic workflow of data sets and analytic methodologies. GMV trajectory in 44 ROIs spanning the cortical and subcortical areas was estimated using linear mixed effect models for adolescents in the IMAGEN study ( $n=1,543$ ). Principal component analysis and multivariate clustering were conducted to identify groups with distinct neurodevelopmental patterns. Next, groups were characterized in terms of neurocognition and risk factors for neuropsychiatric disorders. Genome-wide association study (GWAS) was conducted in the ABCD study ( $n=7,662$ ) using group-reweighted GMV as the proxy phenotype for delayed neurodevelopment, and results were further validated in IMAGEN. Epigenome-wide association study (EWAS) was conducted in IMAGEN ( $n=909$ ) to identify potential environmental exposures associated with neurodevelopment. Last, long-term impacts of the polygenic risk for delayed neurodevelopment on multiple outcomes were investigated among participants in UK Biobank ( $n=502,486$ ) (**Methods**). BL, baseline; FU1, follow-up 1 at 16 y; FU2, follow-up 1 at 19 y; FU3, follow-up 1 at 23 y. **(b)** Whole-brain GMV growth rates (ranging from increase, stable to decrease) at age 5y, 10y, 15y, 20y and 25y were estimated for each group identified in IMAGEN, adjusting for sex, imaging site, handedness and intra-cranial volume (**Methods**). Group 3 showed delayed GMV development compared to Group 1 and 2. **(c)** Total GMV developmental trajectories (with 95% confidence bands) for the three groups identified in the IMAGEN study (Group 1-3). These trajectories were estimated adjusting for sex, imaging site, handedness and intra-cranial volume (**Methods**). Group 1 and 2 exhibited similar GMV developmental trend, while Group 3 had opposite GMV developmental trend. **(d)** The top 5 discriminating ROIs with largest  $t$  values comparing the GMV trajectories between Group 3 ( $n=67$ ) and Group 1 ( $n=711$ ) (top), and between Group 2 ( $n=765$ ) and Group 1 ( $n=711$ ) (bottom), adjusting for sex, imaging site, handedness and intra-cranial volume. Two sample  $t$ -test: Group 3 vs Group 1, IFT ( $d=4.43$ ,  $t=20.13$ ,  $***P_{adj}<0.001$ ), MT ( $d=4.38$ ,  $t=20.07$ ,  $***P_{adj}<0.001$ ), LatOFC ( $d=4.26$ ,  $t=18.31$ ,  $***P_{adj}<0.001$ ), PreC ( $d=3.63$ ,  $t=18.11$ ,  $***P_{adj}<0.001$ ), SF ( $d=3.61$ ,  $t=17.92$ ,  $***P_{adj}<0.001$ ); Group 2 vs Group 1, SF ( $d=1.28$ ,  $t=24.50$ ,  $***P_{adj}<0.001$ ), RMF ( $d=1.14$ ,  $t=21.95$ ,  $***P_{adj}<0.001$ ), CMF ( $d=1.09$ ,  $t=20.77$ ,  $***P_{adj}<0.001$ ), PreC ( $d=1.05$ ,  $t=20.14$ ,  $***P_{adj}<0.001$ ), IFP ( $d=1.00$ ,  $t=19.07$ ,  $***P_{adj}<0.001$ ). LatOFC, lateral orbitofrontal cortex; RMF, rostral middle frontal; CMF, caudal middle frontal; SF, superior frontal; PreC, precentral; MT, middle temporal; IFT, inferior temporal; IFP, inferior parietal.

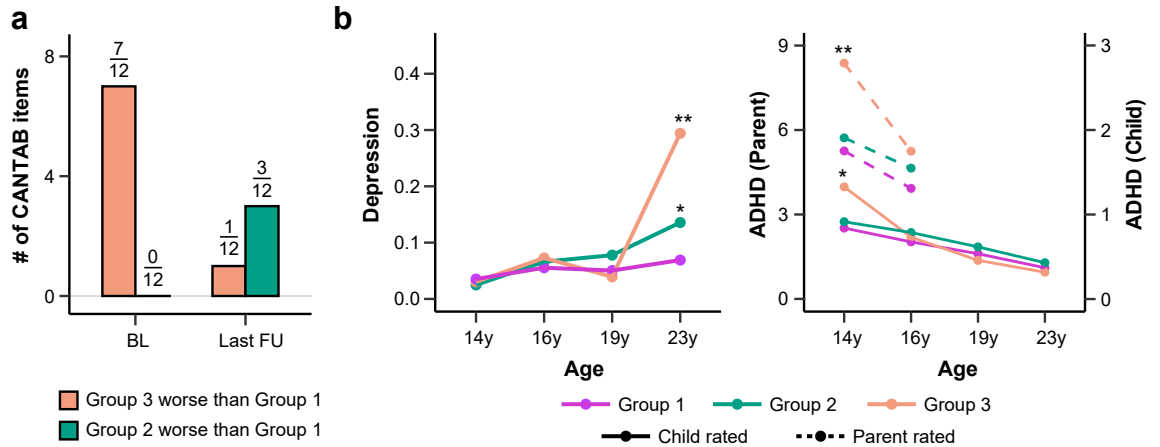

**Fig. 2 Structural neurodevelopment predicts neurocognition and risk factors for neuropsychiatric disorders.**

**(a)** Comparison of neurocognitive performances between Group 3 and Group 1 (orange), and between Group 2 and Group 1 (green) at baseline (BL) and the last follow-up (FU) (**Methods**). Total number of neurocognitive tests in cantab where Group 3 performed worse than Group 1 decreased from 7/12 at baseline to 1/12 at follow-up 3, while the number of tests where Group 2 performed worse than Group 1 increased from 0 to 3/12. Full results with item-specific comparisons among these groups are provided in **Supplementary Fig. 7**. CANTAB, Cambridge Neuropsychological Test Automated Battery. **(b)** Longitudinal trajectories of Depression (Left) and ADHD symptoms (Right) among adolescents in the three groups. Group-specific means at each visit were plotted and \* indicated significant differences relative to Group 1 adjusting for sex, handedness, stie and ICV. Baseline mental health score was also adjusted for comparison at the last follow-up. Statistical tests were conducted at baseline (14y) and the last follow-up. Depression, Group 2 vs Group 1 at 14y ( $d=-0.05$ ,  $P=0.256$ ), Group 2 vs Group 1 at 23y ( $d=0.13$ ,  $*P=0.023$ ), Group 3 vs Group 1 at 14y ( $d=-0.01$ ,  $P=0.566$ ), Group 3 vs Group 1 at 23y ( $d=0.70$ ,  $**P=0.001$ ); Parent rated ADHD, Group 2 vs Group 1 at 14y ( $d=0.04$ ,  $P=0.220$ ), Group 2 vs Group 1 at 16y ( $d=-0.03$ ,  $P=0.574$ ), Group 3 vs Group 1 at 14y ( $d=0.34$ ,  $**P=0.004$ ), Group 3 vs Group 1 at 16y ( $d=0.01$ ,  $P=0.954$ ); Child rated ADHD, Group 2 vs Group 1 at 14y ( $d=-0.03$ ,  $P=0.321$ ), Group 2 vs Group 1 at 23y ( $d=0.02$ ,  $P=0.758$ ), Group 3 vs Group 1 at 14y ( $d=0.34$ ,  $P=0.042$ ), Group 3 vs Group 1 at 23y ( $d=-0.10$ ,  $P=0.579$ ). ADHD, attention-deficit/hyperactivity disorder.

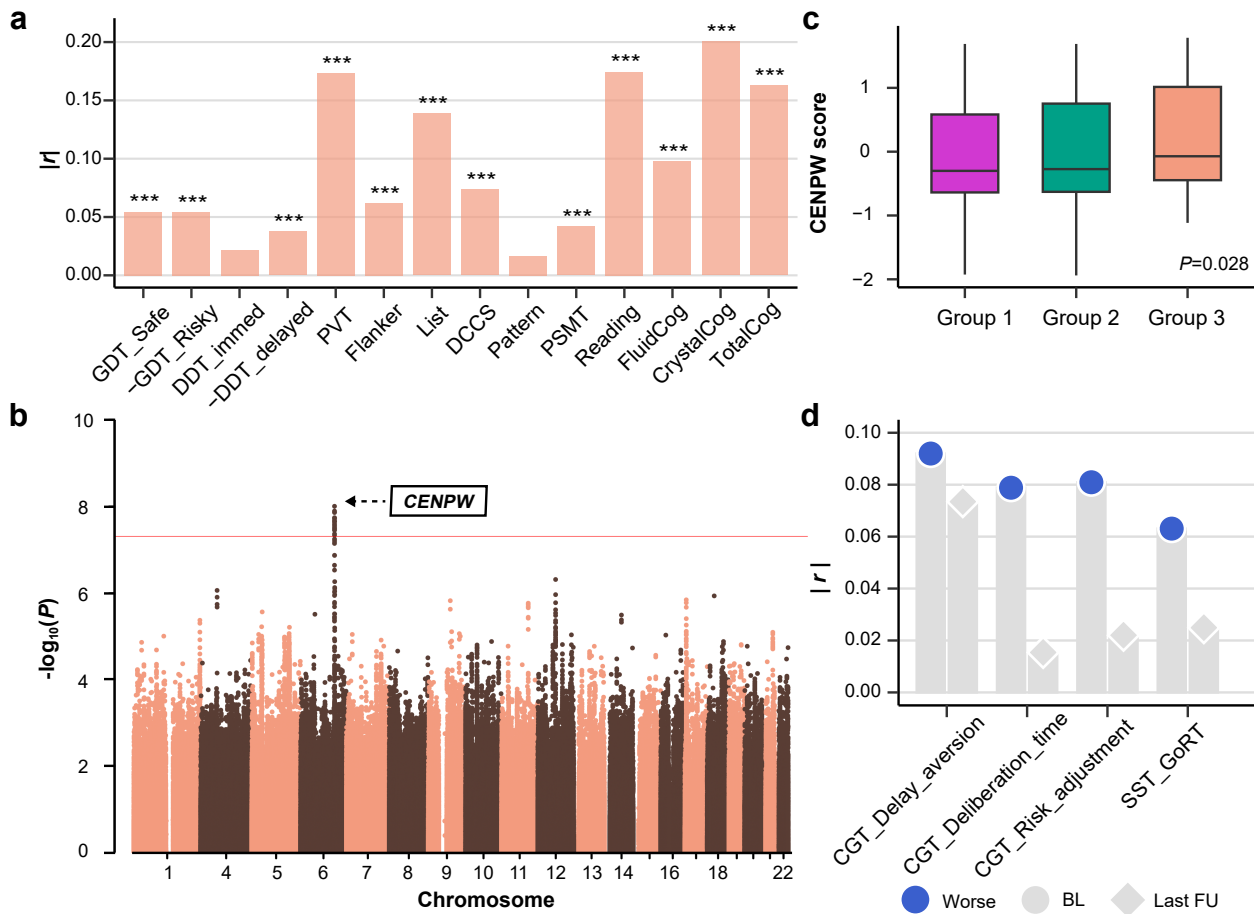

**Fig. 3 Genome-wide association study (GWAS) identified two significant loci associated with delayed neurodevelopment in Group 3.**

**(a)** Correlation between Group3-reweighted GMV and neurocognition (**Supplementary Methods**) in ABCD ( $n=11,101$ ) indicated the validity of using the proxy phenotype for delayed neurodevelopment in the following GWAS. GDT, Game of Dice Task; DDT, Dealy Discounting Task; PVT, Picture Vocabulary Test; Flanker, Flanker Inhibitory Control and Attention Test; List, List Sorting Working Memory Test; DCCS, Dimensional Change Card Sort Test; Pattern, Pattern Comparison Processing Speed Test; PSMT, Picture Sequence Memory Test; Reading, Oral Reading Recognition Test; FluidCog, fluid cognition; CrystalCog, crystallized cognition; TotalCog, total cognition. \*\*\*  $P < 0.001$ ; \*\*  $P < 0.01$ ; \*  $P < 0.05$ . **(b)** GWAS Manhattan plot for Group3-reweighted GMV in the ABCD population ( $n=7,662$ ). Group3-reweighted GMV was calculated for each adolescent (**Methods**) and used as the proxy phenotype for delayed neurodevelopment. Multiple SNPs on chromosome 6 achieved genome-wide significant effects ( $P < 5 \times 10^{-8}$ ). SNPs on chromosome 6 were mapped to the intronic region of *CENPW*. Results from gene based association analysis (**Supplementary Fig. 11**) confirmed the significant effect of *CENPW* on delayed neurodevelopment. Box plot in **(c)** showed that *CENPW* score of delayed neurodevelopment was higher in Group 3 ( $n=60$ ) compared to Group 1 and 2 ( $n=1,338$ ) (two-sided t-test:  $P=0.028$ ). **(d)** indicated that *CENPW* score of delayed neurodevelopment was negatively correlated with baseline (BL) neurocognitive performance, and became non-significant at the last follow-up (FU). Here, *Worse* indicated higher CGT Delay aversion score, lower CGT risk adjustment score, longer CGT Deliberation time and SST GoRT. CGT Delay aversion, BL ( $r=0.09$ ,  $*P_{adj}=0.027$ ), FU3 ( $r=0.07$ ,  $P_{adj}=0.239$ ); CGT Deliberation time, BL ( $r=0.08$ ,  $*P_{adj}=0.027$ ), FU3 ( $r=-0.02$ ,  $P_{adj}=0.983$ ); CGT risk adjustment, BL ( $r=-0.08$ ,  $*P_{adj}=0.027$ ), FU3 ( $r=0.022$ ,  $P_{adj}=0.983$ ); SST GoRT, BL ( $r=-0.06$ ,  $*P_{adj}=0.038$ ), FU3 ( $r=-0.03$ ,  $P_{adj}=0.472$ ). CGT, Cambridge Gambling Task; SST GoRT, reaction time for 'Go' trials in Stop Signal Task. **(c-d)** confirmed the relationship between *CENPW* and delayed neurodevelopment identified in **(b)**.

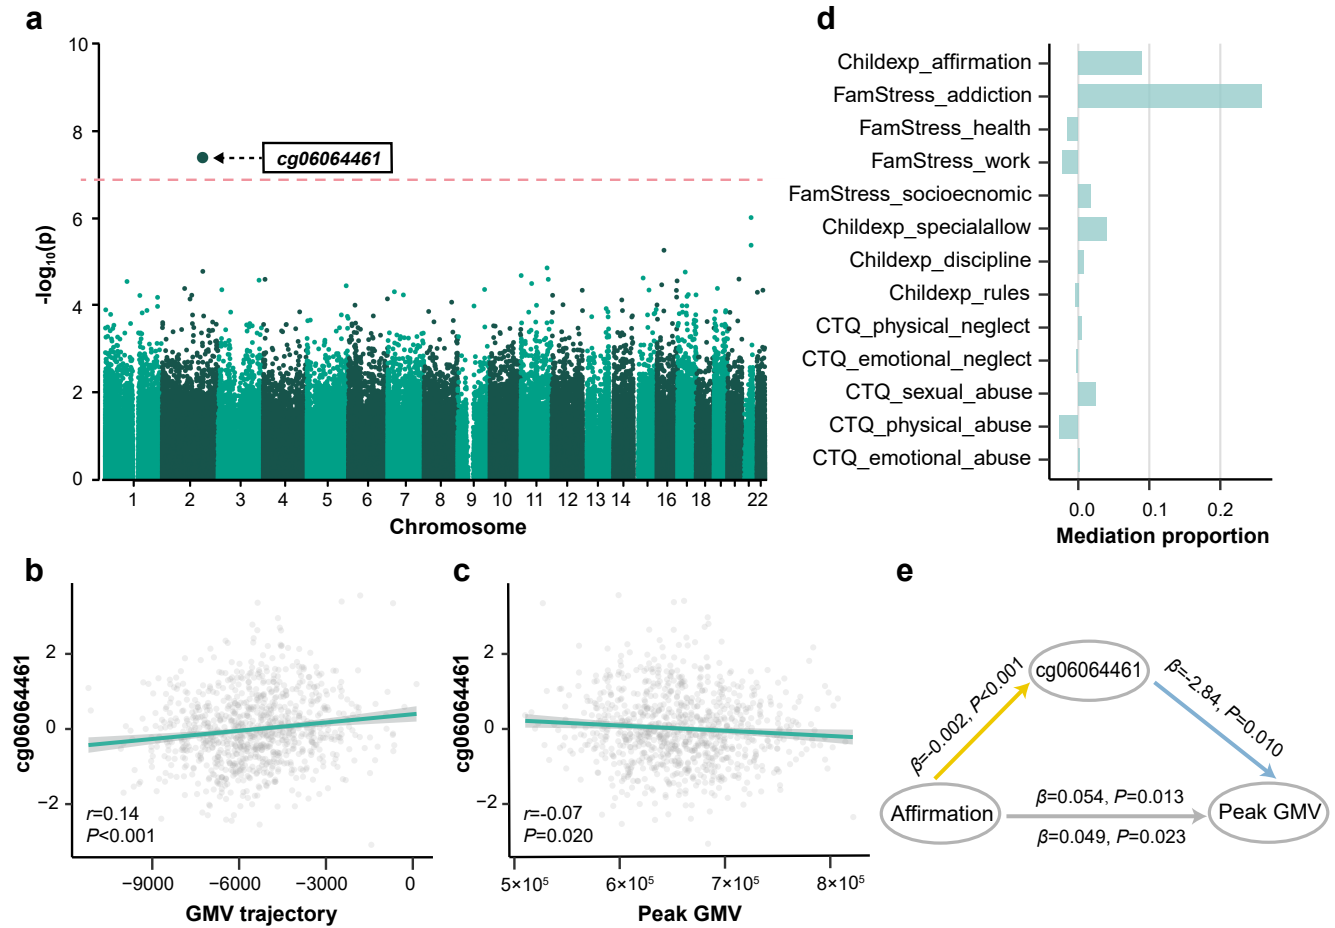

**Fig. 4 Epigenome-wide association study (EWAS) identified significant signals associated with lowered neurodevelopment in Group 2.**

(a) EWAS Manhattan plot in the IMAGEN population. Group 2 ( $n=463$ ) (relative to Group 1,  $n=446$ ) status was used as the phenotype, adjusting for potential confounders (Methods). One hypermethylated site cg06064461 achieved genome-wide significant effect ( $P < 5 \times 10^{-8}$ ,  $P_{adj} < 0.05$ ) and was mapped to *ATF2* and *MIR933* on chromosome 2. (b-c) Validation of EWAS results in IMAGEN ( $n=909$ ). cg06064461 methylation was positively correlated with total GMV trajectory (b;  $r=0.14$ ,  $***P < 0.001$ ) and negatively correlated with peak gray matter volume (GMV) (c;  $r=-0.07$ ,  $*P=0.020$ ), adjusting for potential confounders (Methods). (d) Proportion of the mediation effects through cg06064461 methylation in the environmental exposure - peak GMV pathway, adjusting for potential confounders. Environmental factors were sorted by P values of the mediation effects. Although none mediation effects of cg06064461 methylation showed statistical significance after correcting for multiple testing, nominal significance was observed between family affirmation and peak GMV. Childexp, child's experience of family life; FamStress, family stressors; CTQ, Childhood Trauma Questionnaire. (e) Mediation model was conducted to analyze the direct and indirect effect of family affirmation on peak GMV, with cg06064461 methylation as the mediator. Results showed that cg06064461 methylation significantly mediate the relationship between family affirmation and peak GMV ( $\beta=0.005$ ,  $*P=0.048$ ).



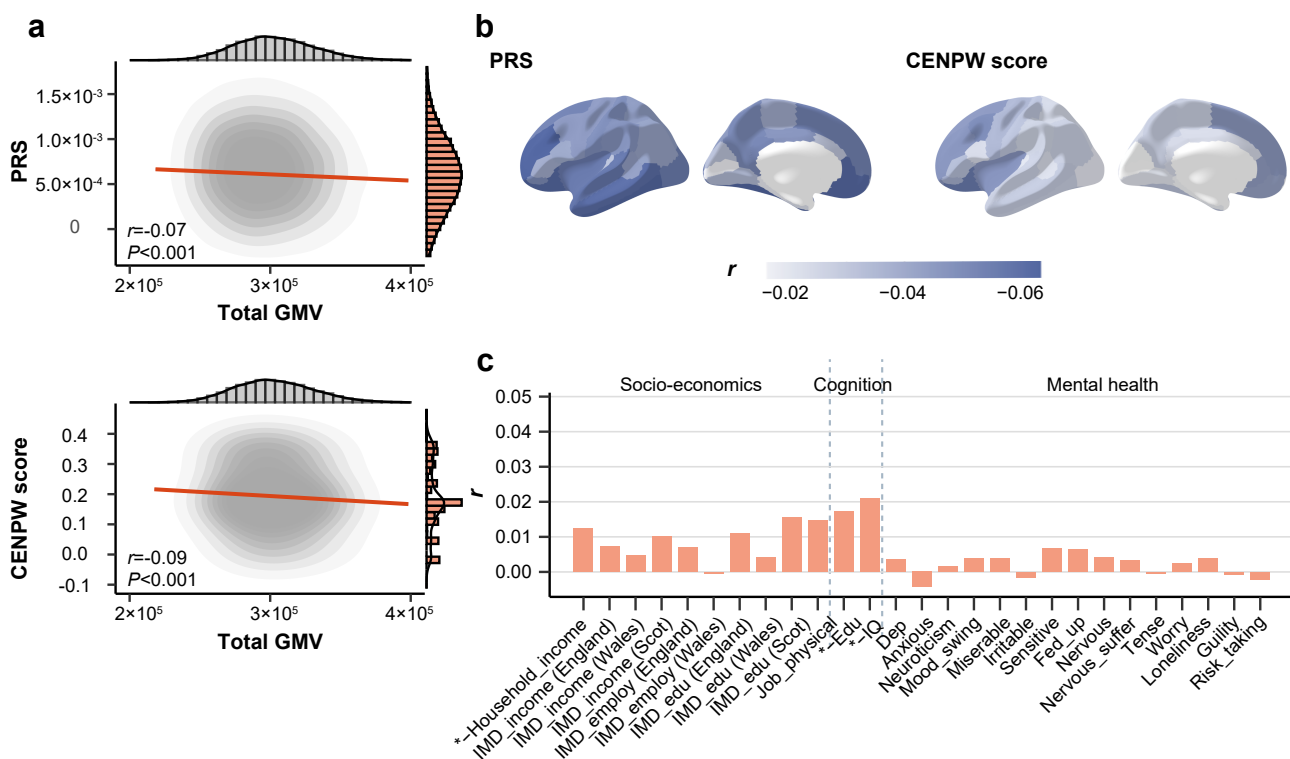

**Fig. 5 Genetically-predicted neurodevelopment had limited impact on socio-economic, cognitive and mental health outcomes in mid-to-late adulthood.**

(a) Correlation between polygenic risk score (PRS) of delayed neurodevelopment and total gray matter volume (GMV) for participants in UK Biobank ( $n=337,199$ ). Marginal distributions of PRS and total GMV were both normal. PRS and CENPW score both showed negative correlation with total GMV ( $r=-0.07$ ,  $***P<0.001$  for PRS and  $r=-0.07$ ,  $***P<0.001$  for CENPW score). PRS were averaged over different P value thresholds. (b) Correlation between averaged PRS of delayed neurodevelopment and CENPW score and regional GMV for participants in UK Biobank. Inferior temporal ( $r=-0.07$ ,  $***P_{adj}<0.001$ ), fusiform ( $r=-0.06$ ,  $***P_{adj}<0.001$ ), middle temporal ( $r=-0.06$ ,  $***P_{adj}<0.001$ ), medialorbitofrontal ( $r=-0.06$ ,  $***P_{adj}<0.001$ ) and lateralorbitofrontal ( $r=-0.06$ ,  $***P_{adj}<0.001$ ) were among the ROIs with the strongest correlation with PRS, while lateralorbitofrontal ( $r=-0.06$ ,  $***P_{adj}<0.001$ ), caudalmiddlefrontal ( $r=-0.05$ ,  $***P_{adj}<0.001$ ), rostralmiddlefrontal ( $r=-0.05$ ,  $***P_{adj}<0.001$ ), insula ( $r=-0.05$ ,  $***P_{adj}<0.001$ ) and superiorfrontal ( $r=-0.05$ ,  $***P_{adj}<0.001$ ) were ROIs having the strongest correlation with CENPW score. These were consistent with the results that participants with higher PRS of delayed neurodevelopment also had worse performance in spatial working memory in UK Biobank. (c) Inferiority test of the correlation between averaged PRS and socio-economic, cognitive and mental health outcomes (**Supplementary Methods**) indicated that polygenic risk of delayed neurodevelopment had limited effect on the long-term socio-economic, cognitive and mental health outcomes. Full results were displayed in **Supplementary Fig. 14**. Similar results were observed between CENPW score and these long-term outcomes (**Supplementary Fig. 15**). IMD, Indices of Multiple Deprivation; Scot, Scotland; Edu, the highest educational level; IQ, intelligence.
