# Supplementary material for: Structural neurodevelopment at the individual level - a life-course investigation using ABCD, IMAGEN and UK Biobank data
Source: bioRxiv or medRxiv preprint supplement (doi:10.1101/2023.09.20.23295841), 2023-09-22
Supplement: Supplementary file [file media-1.pdf]

## Contents of Supplementary Figures

|                                                                                                                                     |    |
|-------------------------------------------------------------------------------------------------------------------------------------|----|
| Supplementary Fig. 1. The joint distribution of baseline total GMV and GMV developmental trajectories .....                         | 3  |
| Supplementary Fig. 2. The first two PCA components .....                                                                            | 4  |
| Supplementary Fig. 3. The Elbow Method showing the optimal k.....                                                                   | 5  |
| Supplementary Fig. 4. Total GMV developmental curves of groups from 14y to 23y .....                                                | 6  |
| Supplementary Fig. 5. Estimated total GMV developmental curves of individuals in groups from 5y to 37y .....                        | 7  |
| Supplementary Fig. 6. Estimated total GMV developmental curves of groups from 5y to 37y .....                                       | 8  |
| Supplementary Fig. 7. Neurocognition comparisons of Group 3 and Group 2 vs Group 1 at baseline and last follow-up .....             | 9  |
| Supplementary Fig. 8. Correlation between longitudinal trajectory of GMV in each cortical ROI and neurocognition in groups.....     | 10 |
| Supplementary Fig. 9. Locus zoom of the top SNP rs9375442 on chromosome 6 .....                                                     | 11 |
| Supplementary Fig. 10. Associations between SNPs on CENPW and cortical surface area (CSA) and brain volume (BV) in existing studies | 12 |
| Supplementary Fig. 11. Gene-based GWAS results for delayed neurodevelopment .....                                                   | 14 |
| Supplementary Fig. 12. Validation of GWAS results for delayed                                                                       |    |

|                                                                                                                                                   |    |
|---------------------------------------------------------------------------------------------------------------------------------------------------|----|
| neurodevelopment in IMAGEN .....                                                                                                                  | 15 |
| Supplementary Fig. 13. GWAS results and validation for Group 2 vs<br>Group 1 .....                                                                | 16 |
| Supplementary Fig. 14. Correlations between all PRS and socio-<br>economics, cognitive and mental health and in UKB.....                          | 17 |
| Supplementary Fig. 15. Correlations between CENPW score and socio-<br>economics, cognitive and mental health and in UKB.....                      | 18 |
| Supplementary Fig. 16. The top 5 discriminating ROIs with largest t<br>values comparing the GMV trajectories between Group 3 and Group 2<br>..... | 19 |
| Supplementary Fig. 17. Miami plot of GWAS for Group 3 vs Group 1 and<br>Group 2 .....                                                             | 20 |
| Supplementary Fig. 18. Q-Q plots of GWAS for Group 3 vs Group 1 and<br>Group 2 .....                                                              | 21 |
| Supplementary Fig. 19. Q-Q plot of GWAS for Group 3 vs Group 1/2<br>.....                                                                         | 22 |

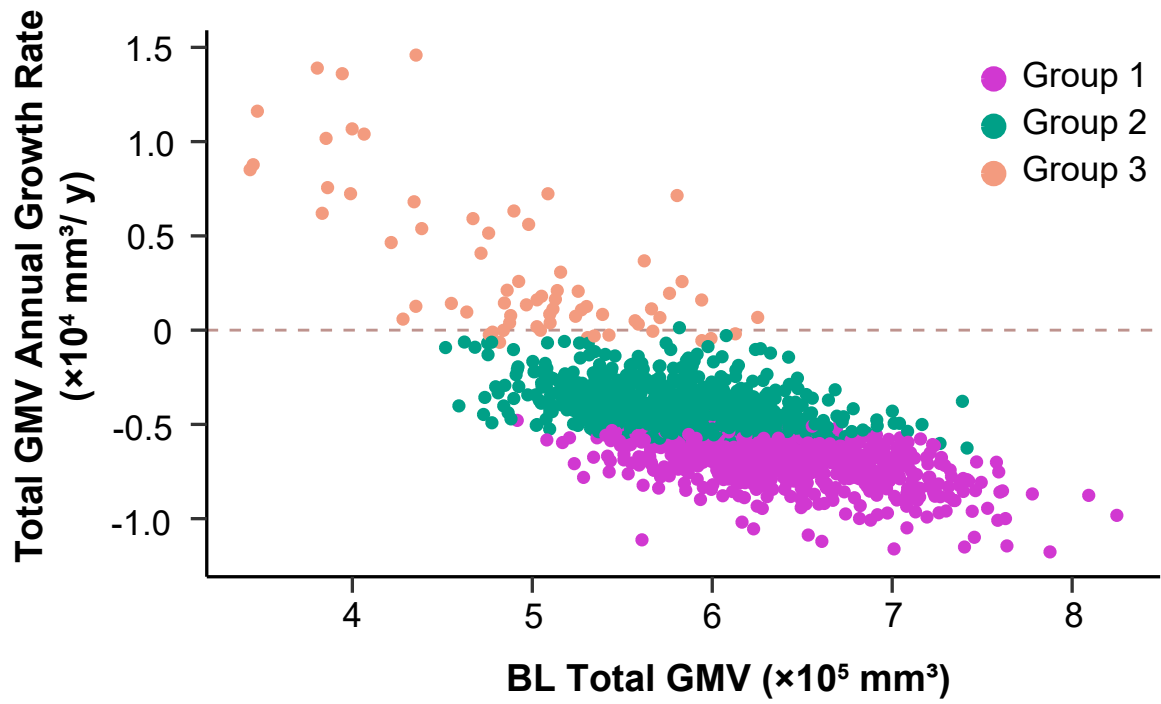

**Supplementary Fig. 1. The joint distribution of baseline total GMV and GMV developmental trajectories.** Individuals in IMAGEN ( $n=1,543$ ) exhibit remarkable heterogeneity in baseline (BL) total GMV and annual growth rate of total GMV from baseline to follow-ups.

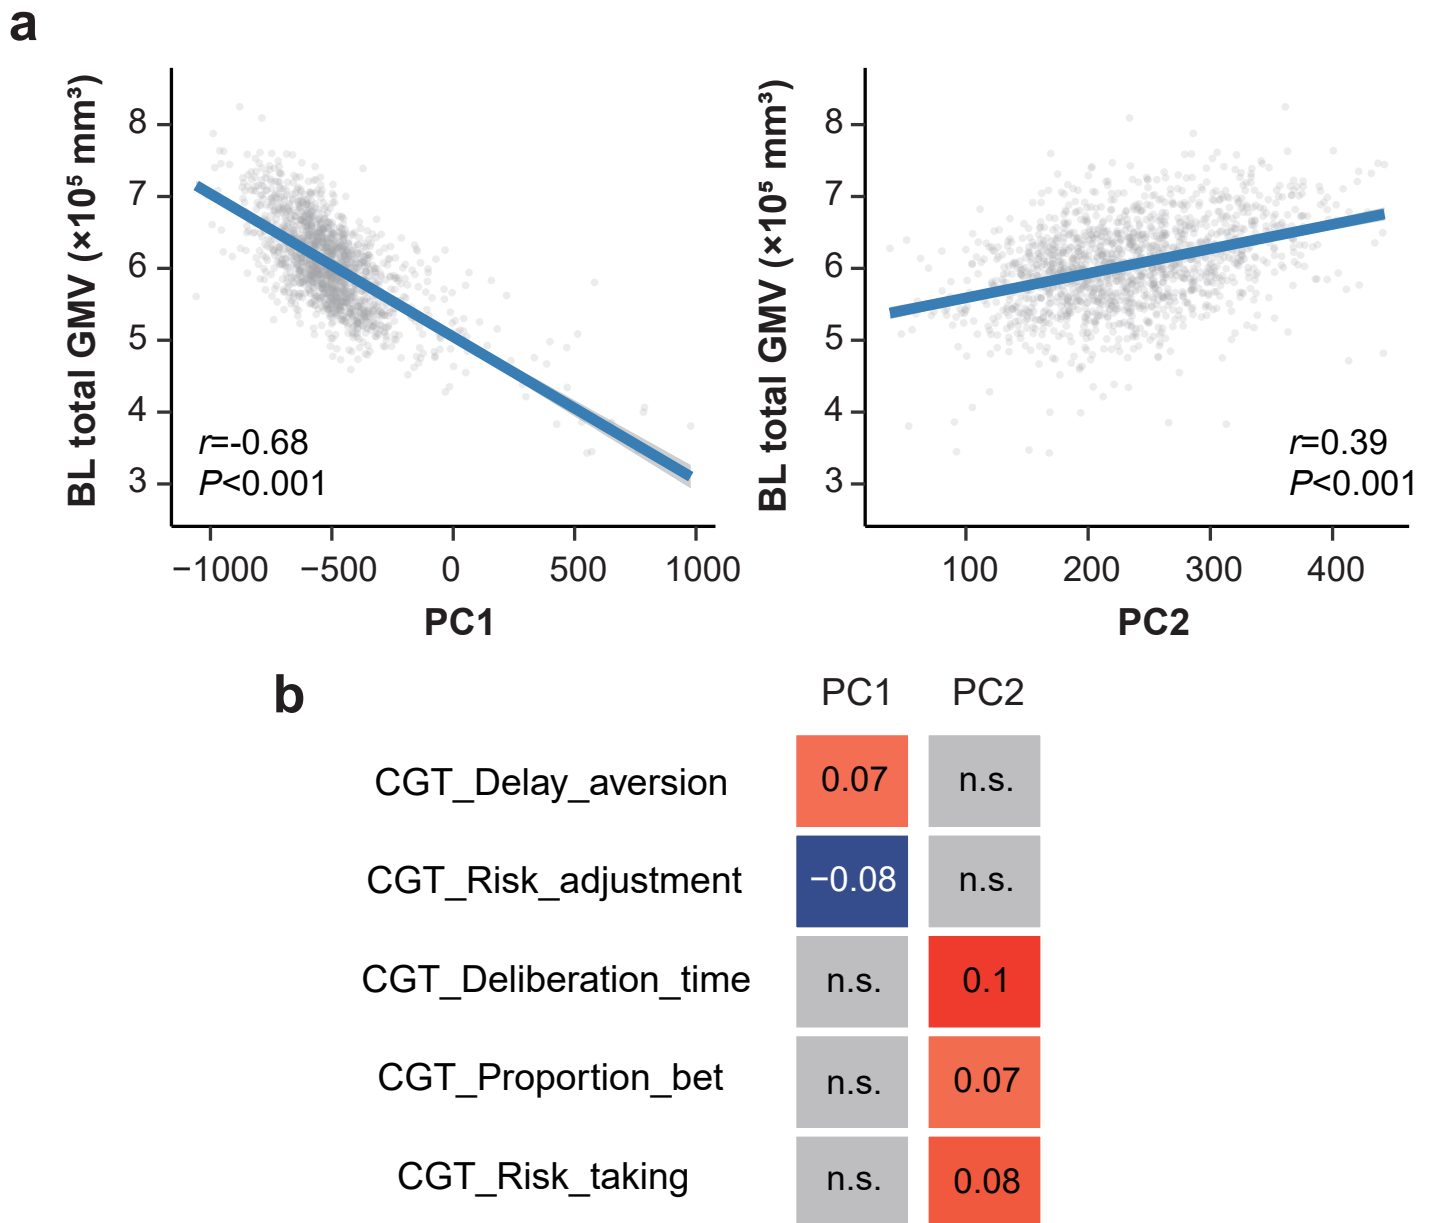

**Supplementary Fig. 2. The first two PCA components.** Principal component analysis was used to define a low-dimensional representation of GMV developmental patterns. The first and second PCs were significantly associated with baseline total GMV (**a**) ( $n=1,543$ ) while they exhibited different association patterns with executive functions in the Cambridge Gambling Task (CGT) (**b**). (**b**) illustrates the correlations between PCs and CGT performances (n.s. = not significant).

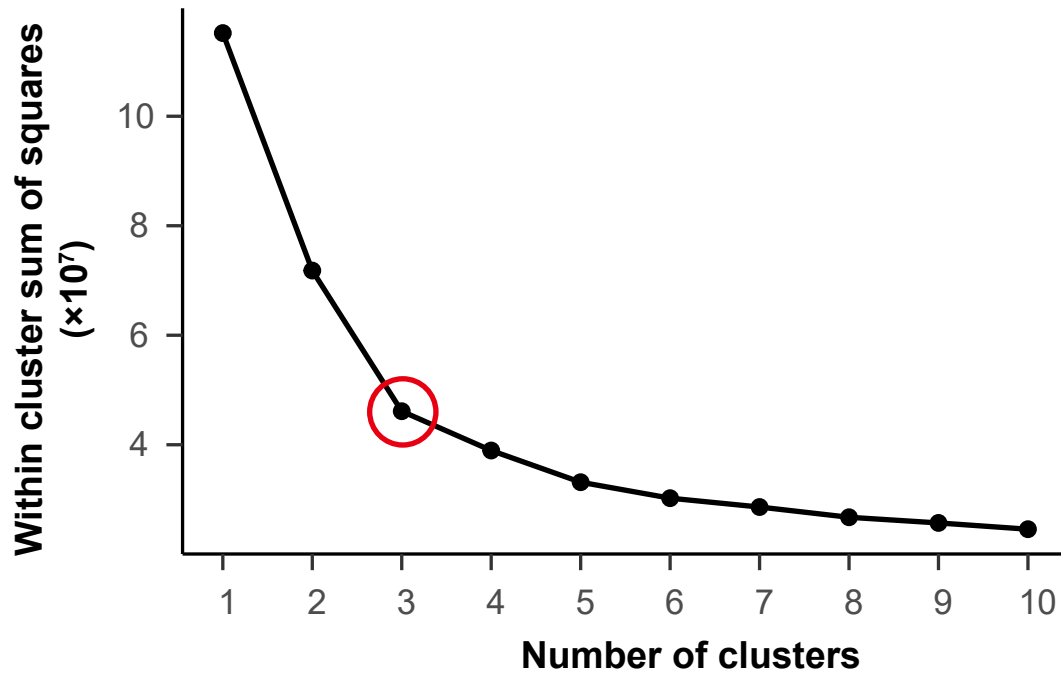

**Supplementary Fig. 3. The Elbow Method showing the optimal k.** Considering the distribution of population among groups, 3 was chosen as the optimal number of cluster.

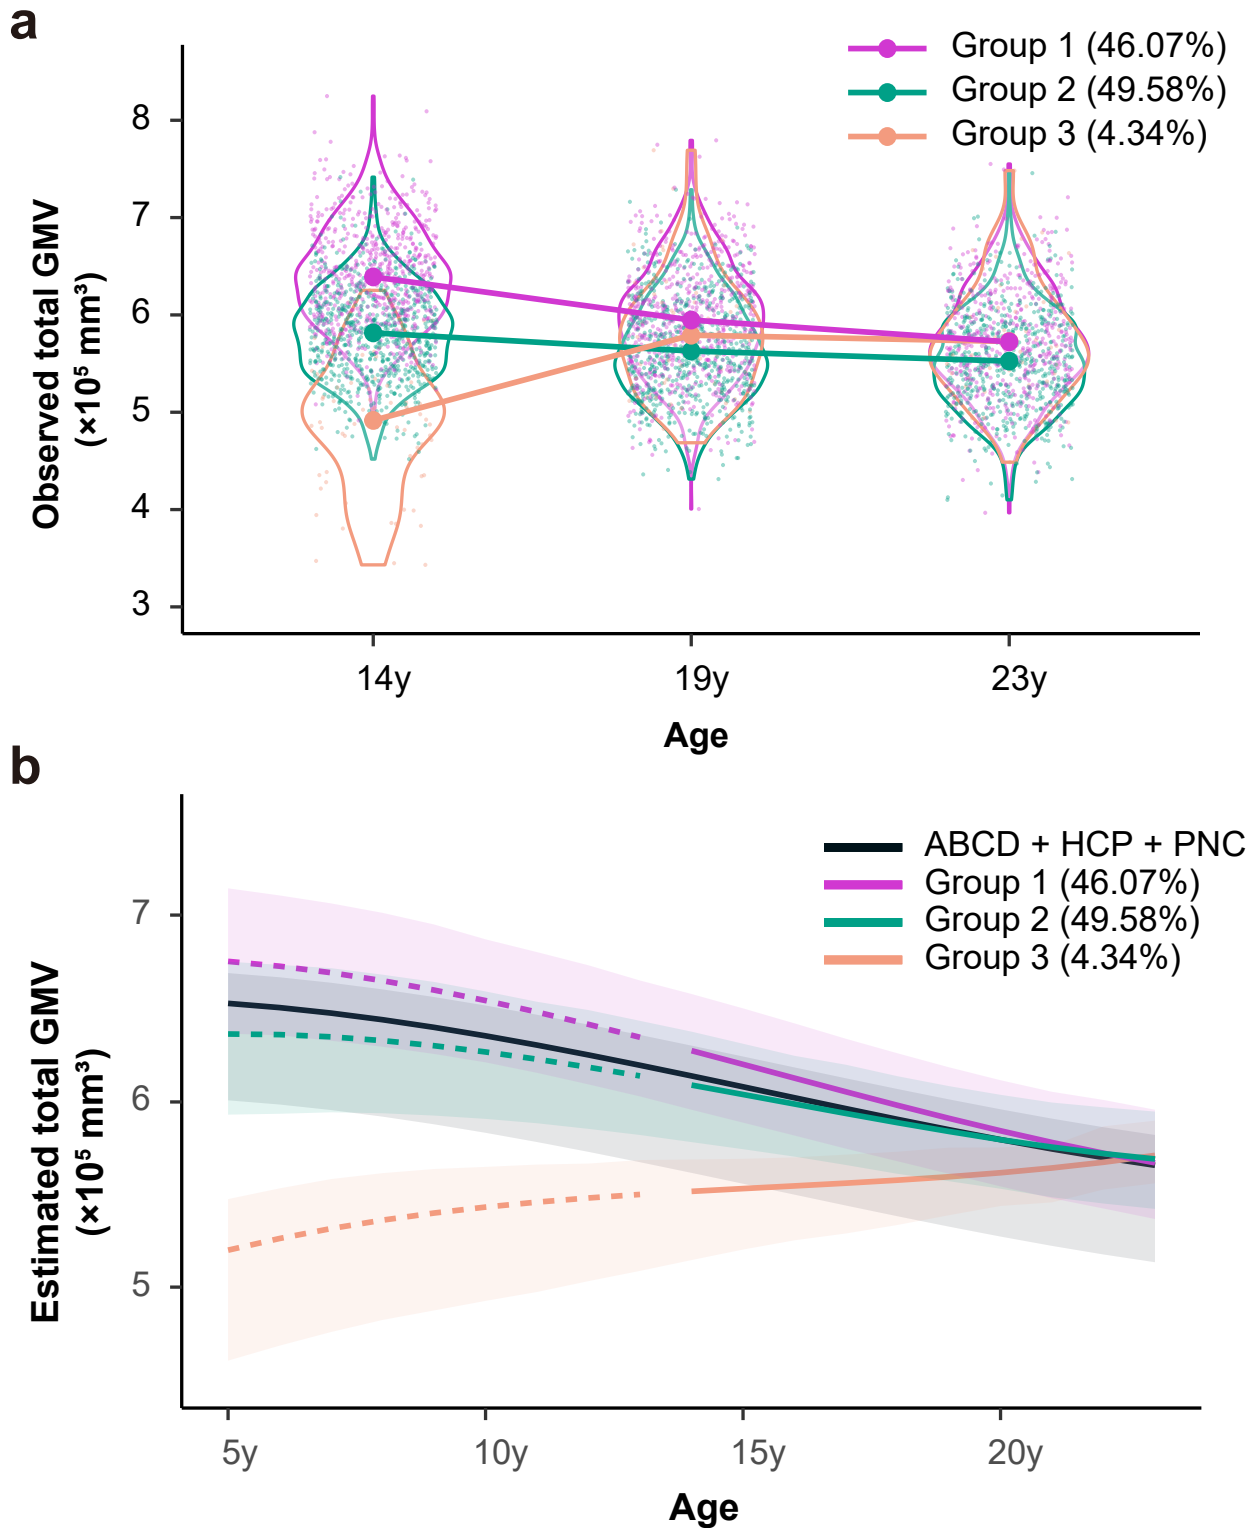

**Supplementary Fig. 4. Total GMV developmental curves of groups from 14y to 23y. (a)** Observed total GMV developmental curves of groups from 14y to 23y ( $n=711$  for Group 1,  $n=765$  for Group 2,  $n=67$  for Group 3). **(b)** Estimated total GMV developmental curves (with 95% confidence bands) for groups and reference population (ABCD+HCP+PNC,  $n=21,826$ ). These curves were estimated adjusting for sex, site/scanner, handedness and intra-cranial volume (**Methods**). Group 1 and 2 exhibited similar GMV developmental trend with the reference population, while Group 3 had opposite GMV developmental trend.

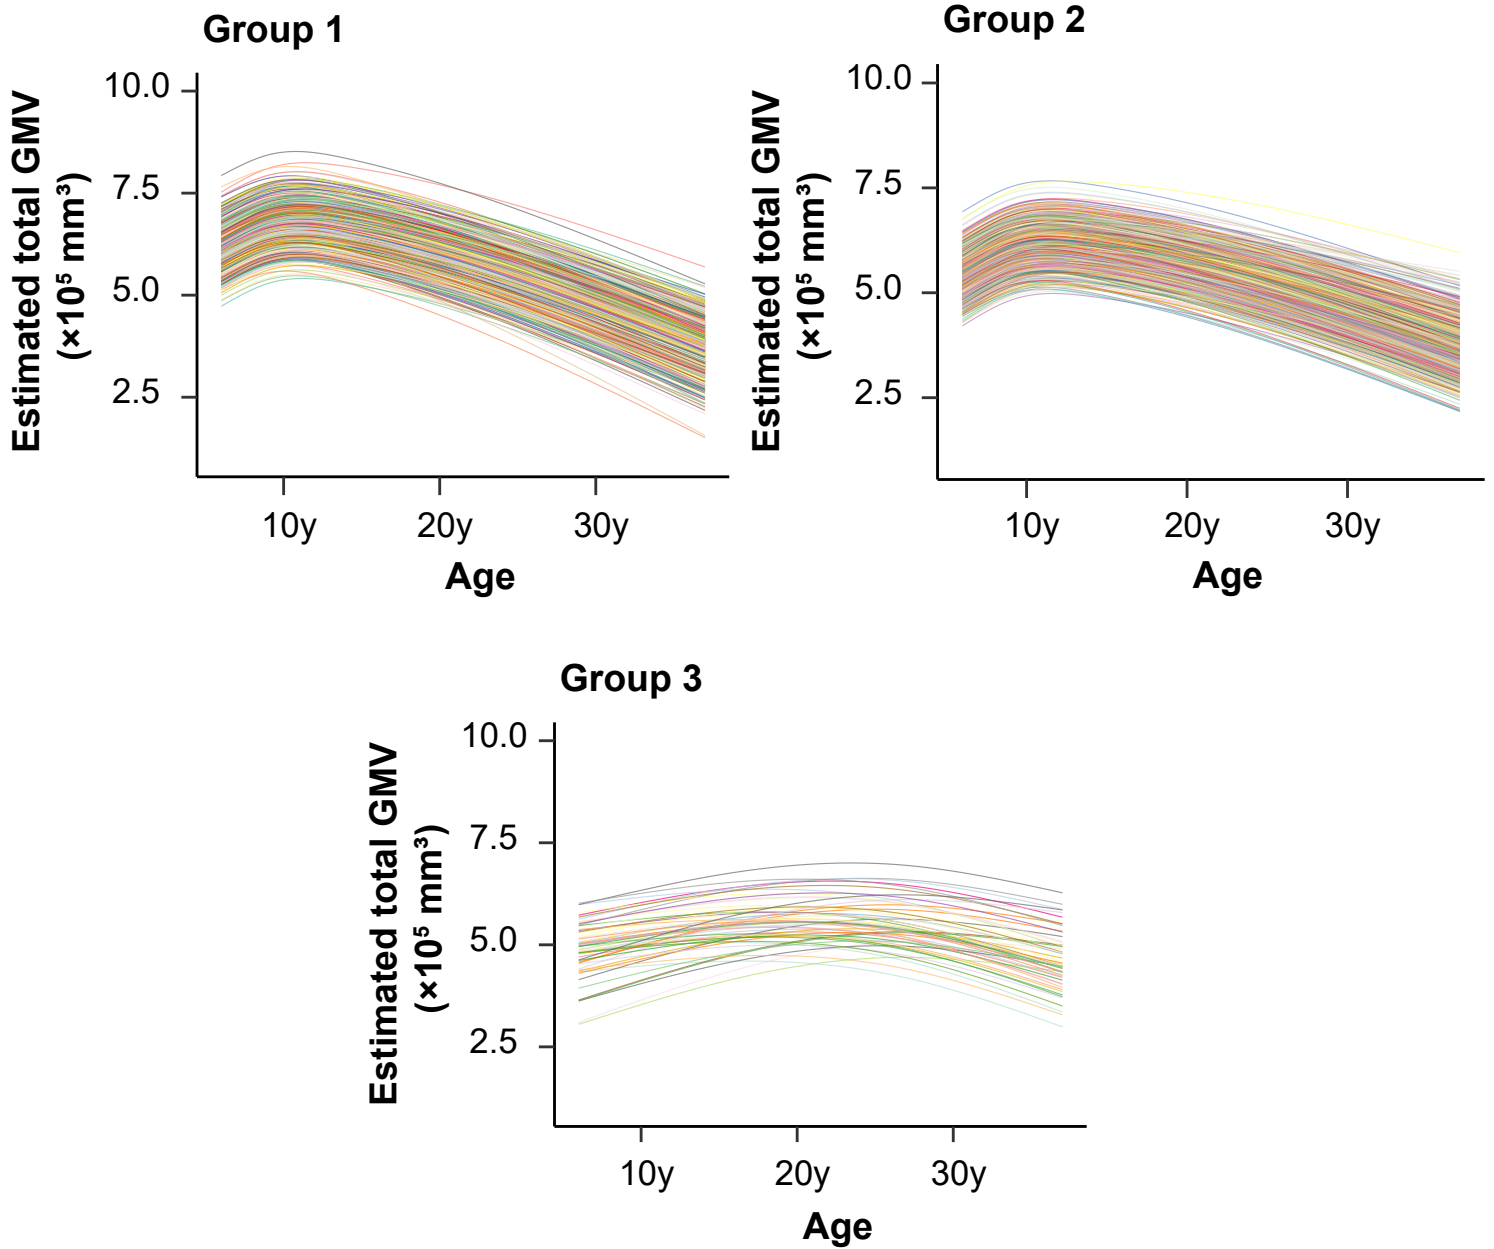

**Supplementary Fig. 5. Estimated total GMV developmental curves of individuals in groups from 5y to 37y.** Total GMV developmental trajectories for individuals in three groups were estimated using linear mixed effect model with B spline function of age (**Methods**).

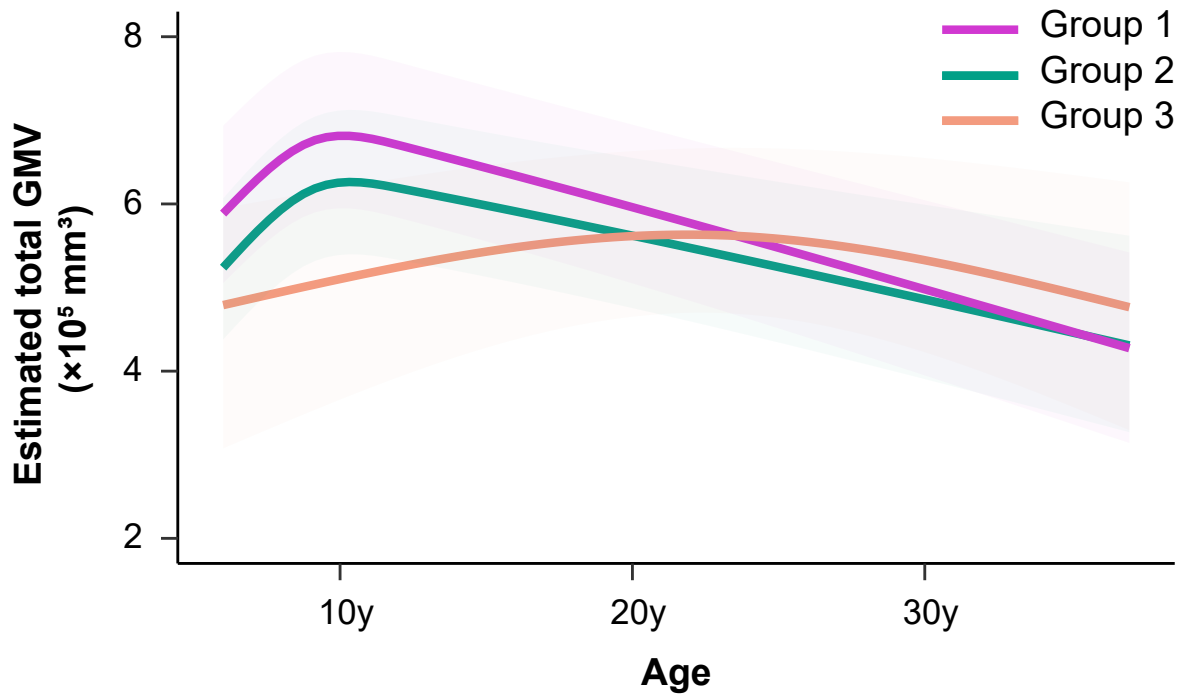

**Supplementary Fig. 6. Estimated total GMV developmental curves of groups from 5y to 37y.** Mean total GMV developmental trajectories (with 95% confidence bands) for groups were plotted using estimated individual GMV trajectories in **Supplementary Fig. 5**. Ranges from the 2.5th percentile to the 97.5th percentile of the corresponding group were plotted as bands.



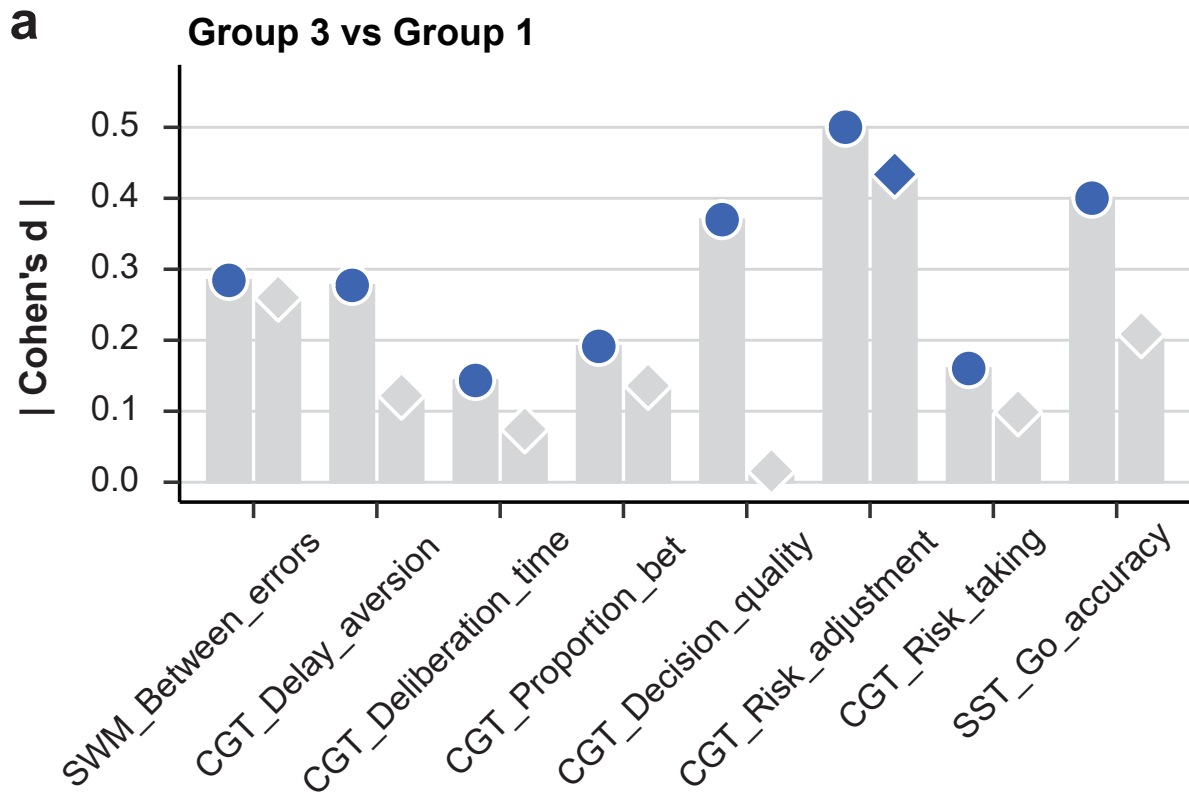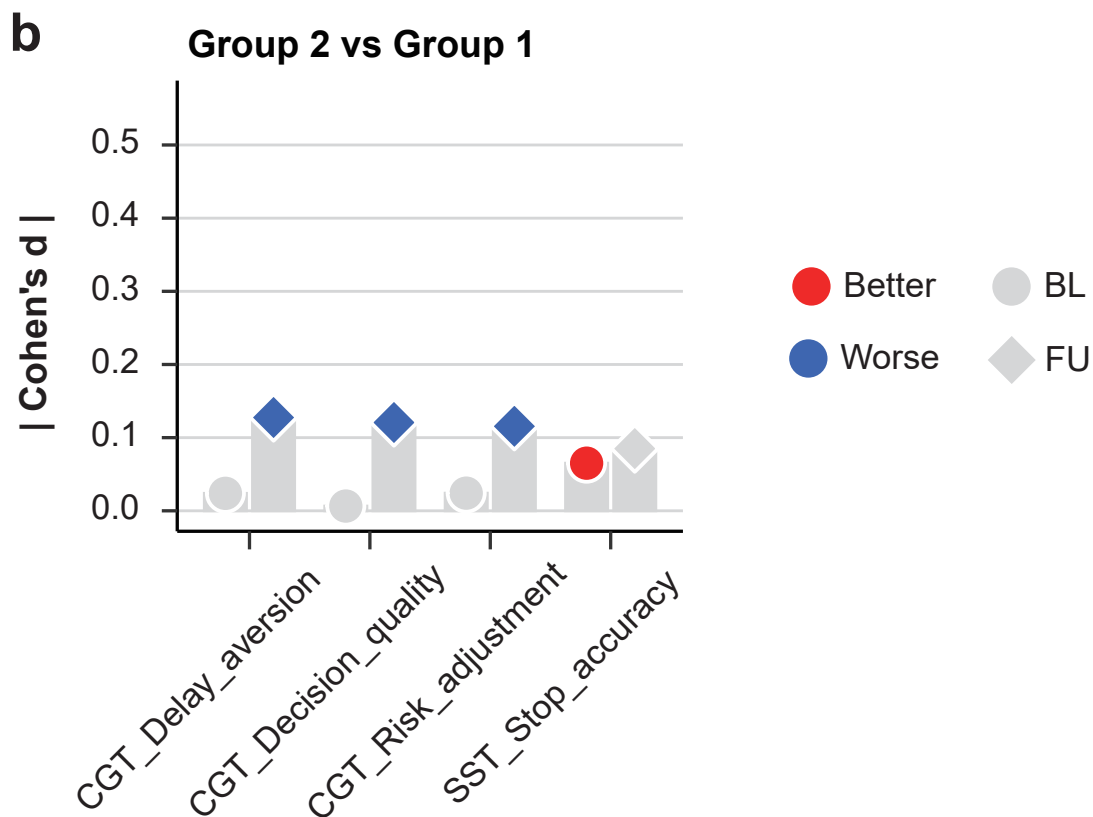

**eSupplementary Fig. 7. Neurocognition comparisons of Group 3 and Group 2 vs Group 1 at baseline and last follow-up.** Neurocognition profiles of Group 3 (a) and Group 2 (b) at baseline (14y) and last follow-up (23y). Comparisons of neurocognitive performances were converted to Cohen's d and item-specific neurocognitive comparisons reflect better or worse performances relative to Group 1. Gray color indicated not significant results. SST comparisons were not included in the count in **Fig. 2a**.

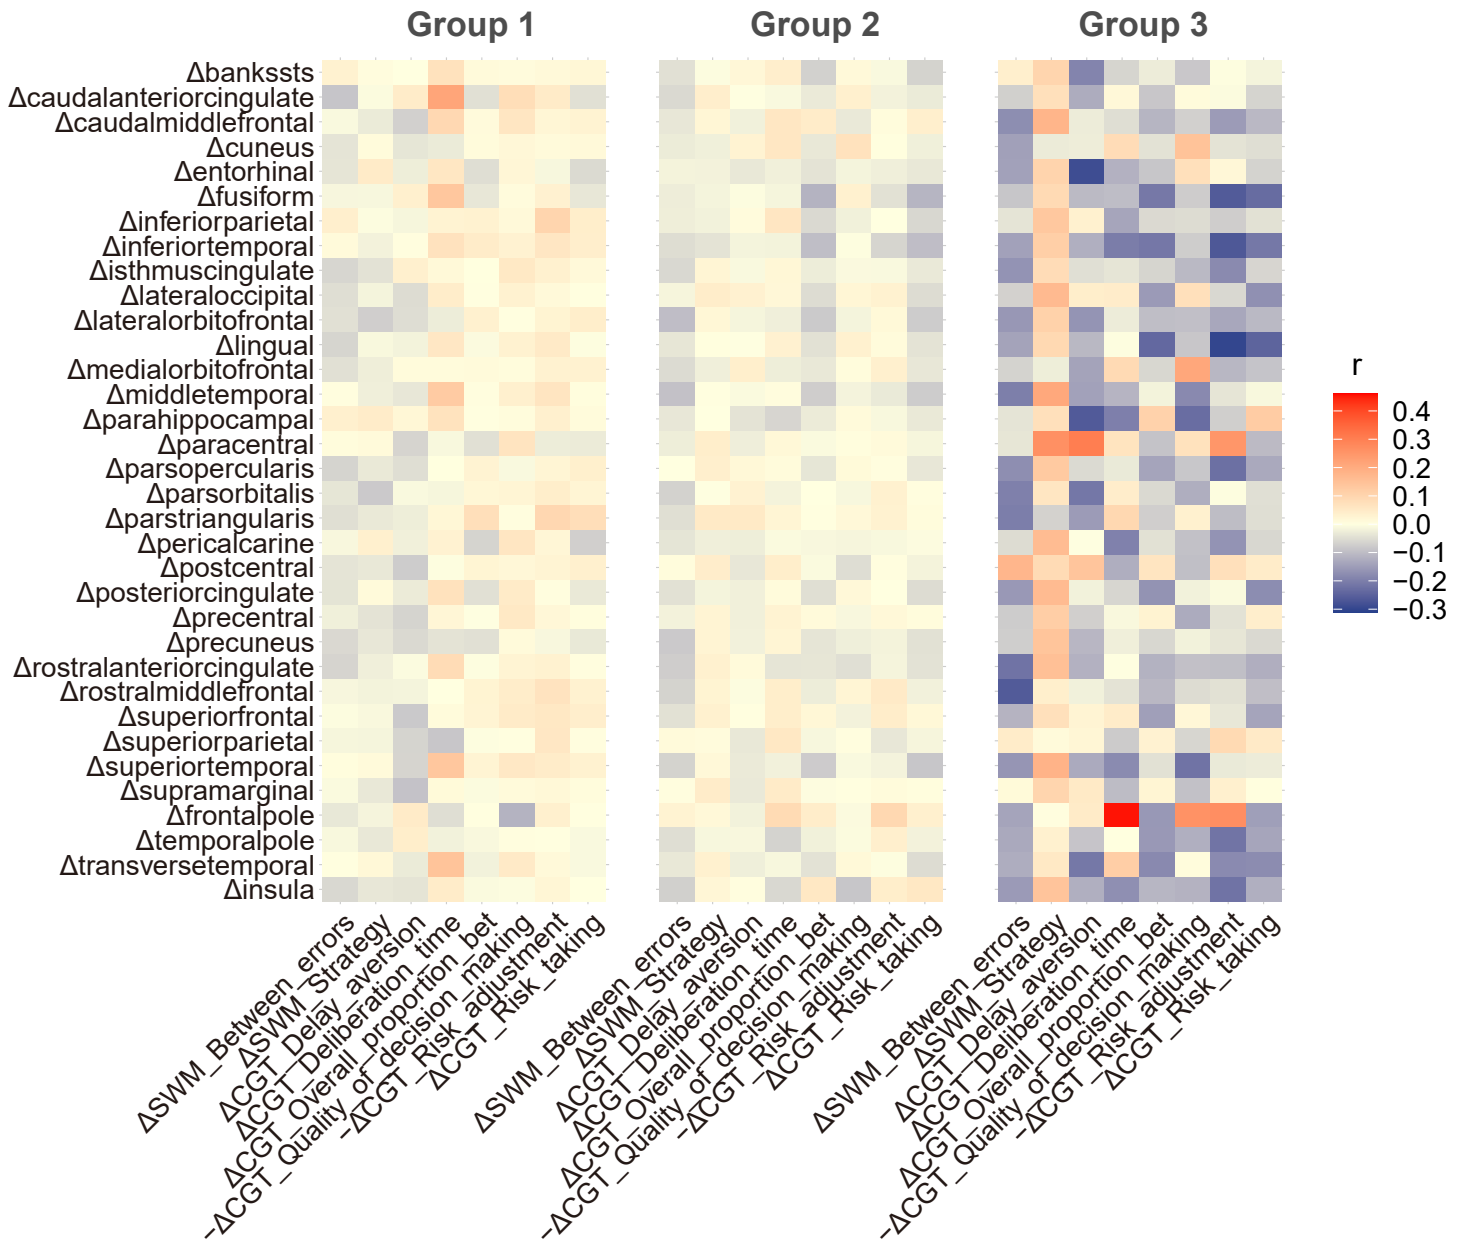

**Supplementary Fig. 8. Correlation between longitudinal trajectory of GMV in each cortical ROI and neurocognition in groups.** Negative correlations between the developmental trajectories of GMV in the top discriminating ROIs and neurocognitive performances for Group 2 ( $n=765$ ) were observed while increasing GMV in the top discriminating ROIs showed positive correlation with improvements of neurocognitive functions for Group 3 ( $n=67$ ).

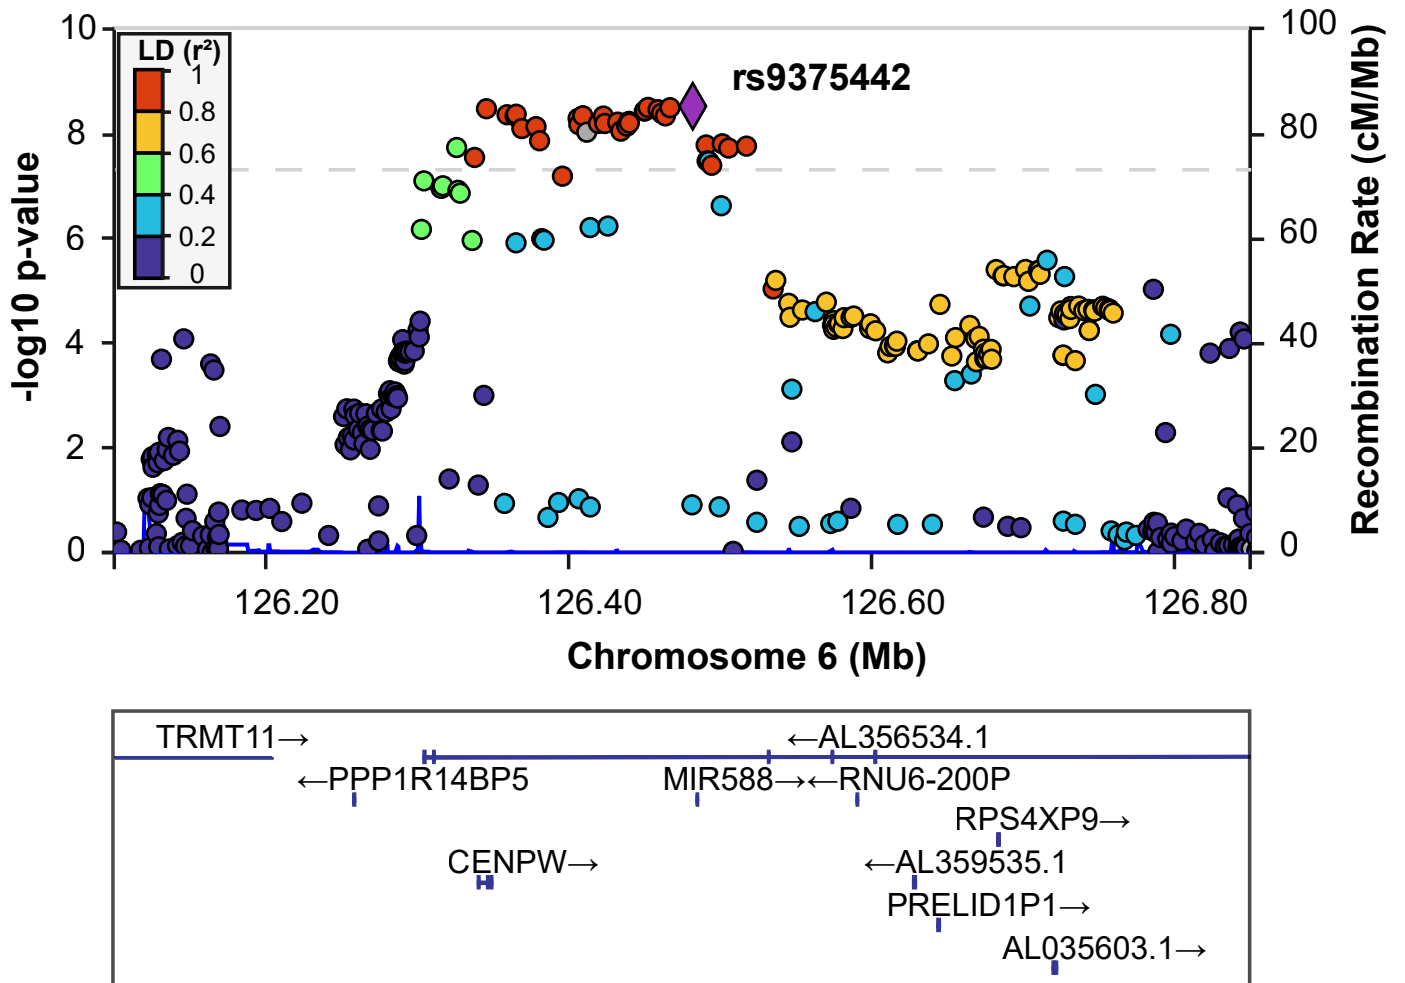

Supplementary Fig. 9. Locus zoom of the top SNP rs9375442 on chromosome 6.

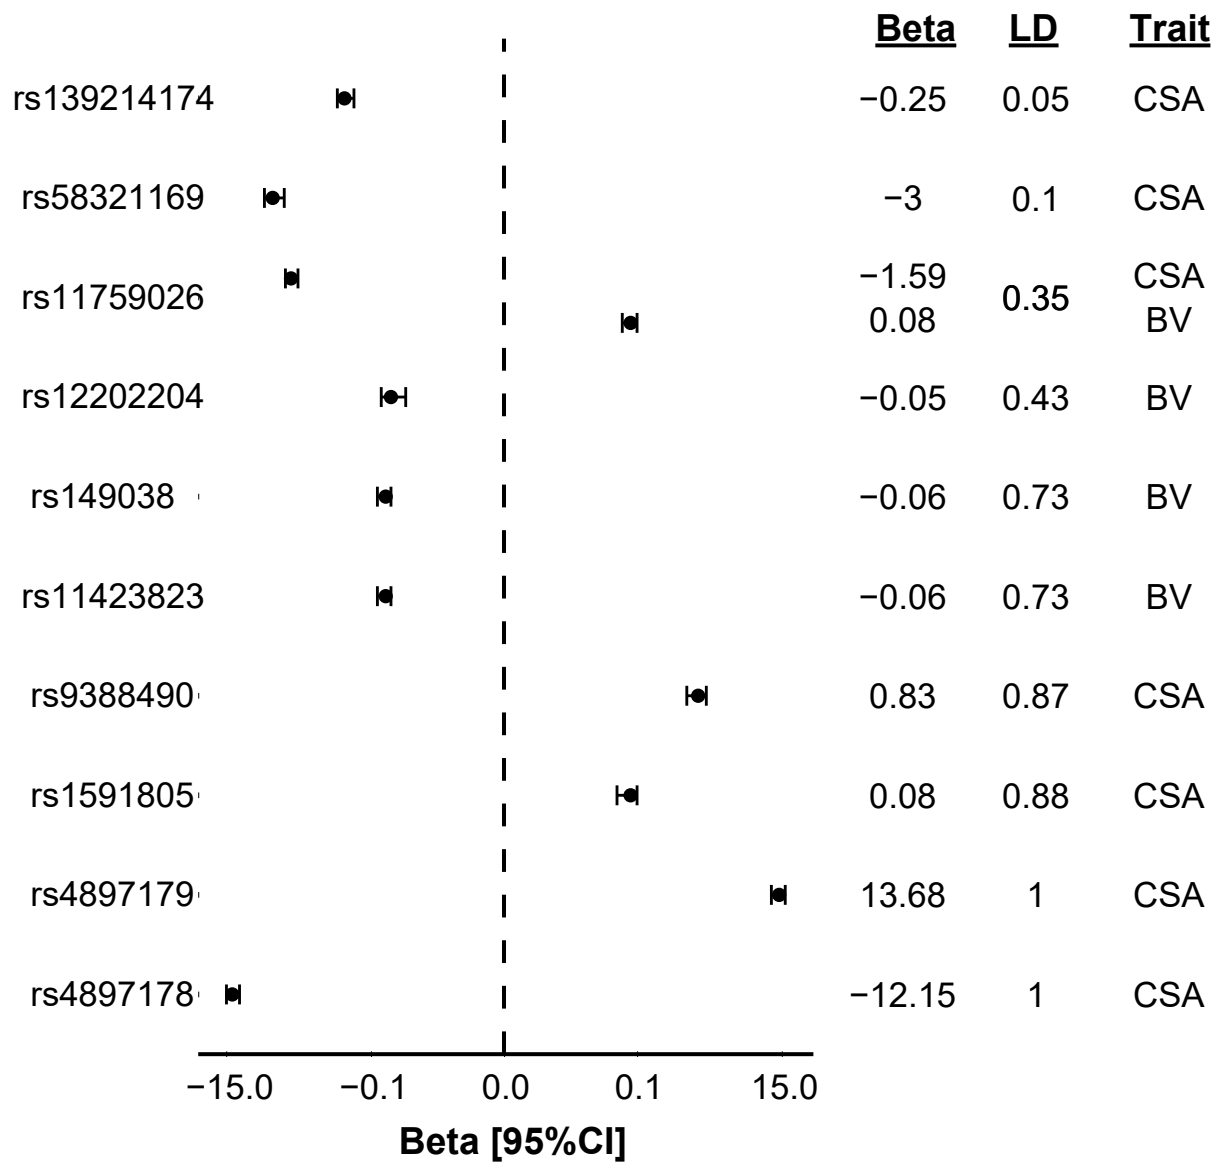

**eFigure 10. Associations between SNPs on CENPW and cortical surface area (CSA) and brain volume (BV) in existing studies.** Beta values and their 95% confidence intervals for each SNP were plotted in the forest plot, and LD were calculated for the corresponding SNP with the leading SNP from GWAS results in **Fig. 3b**.

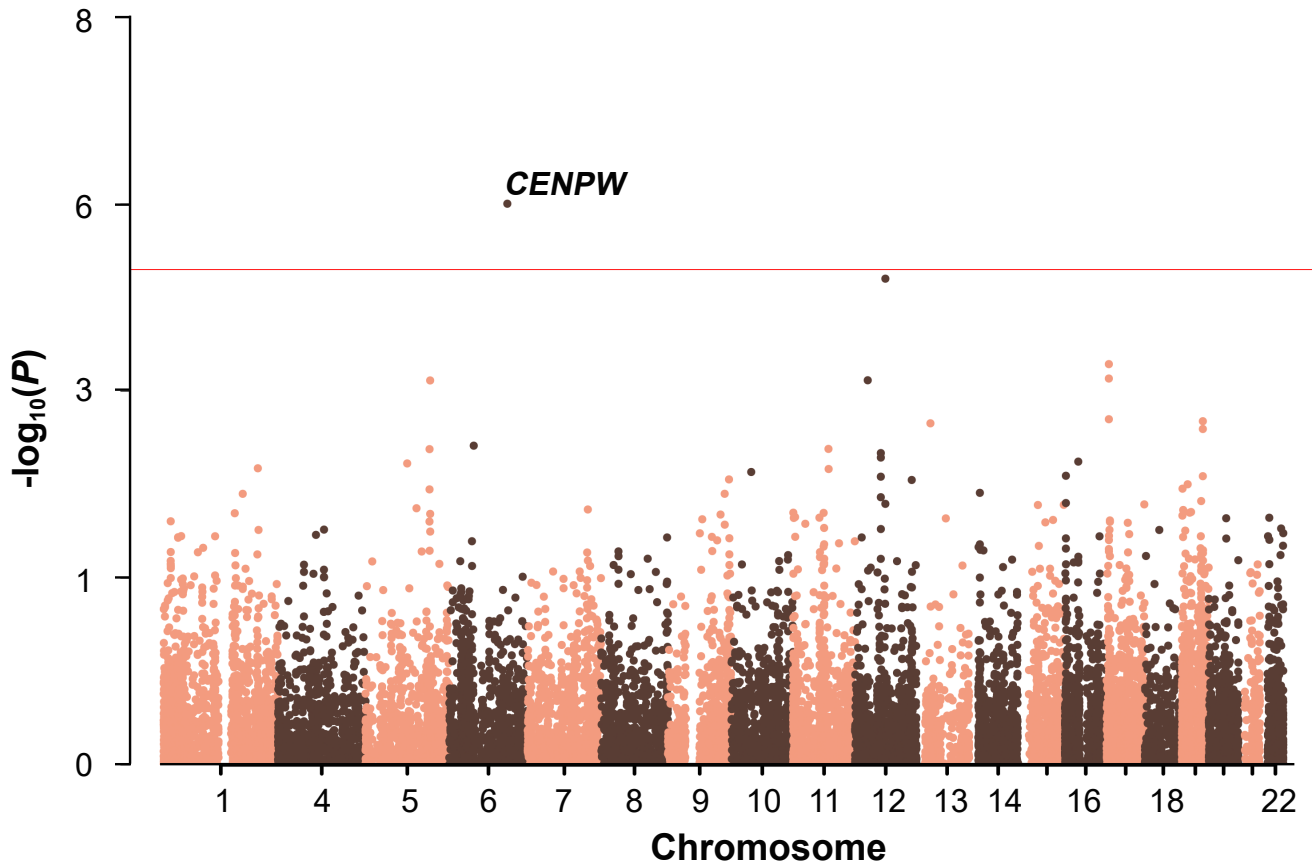

**Supplementary Fig. 11. Gene-based GWAS results for delayed neurodevelopment.** Gene-based association tests ( $n=7,662$ ) identified one genome-wide significant genes (*CENPW*,  $P=9.86 \times 10^{-7}$ ) (significance level:  $P=5 \times 10^{-6}$ ) associated with delayed neurodevelopment in Group 3.

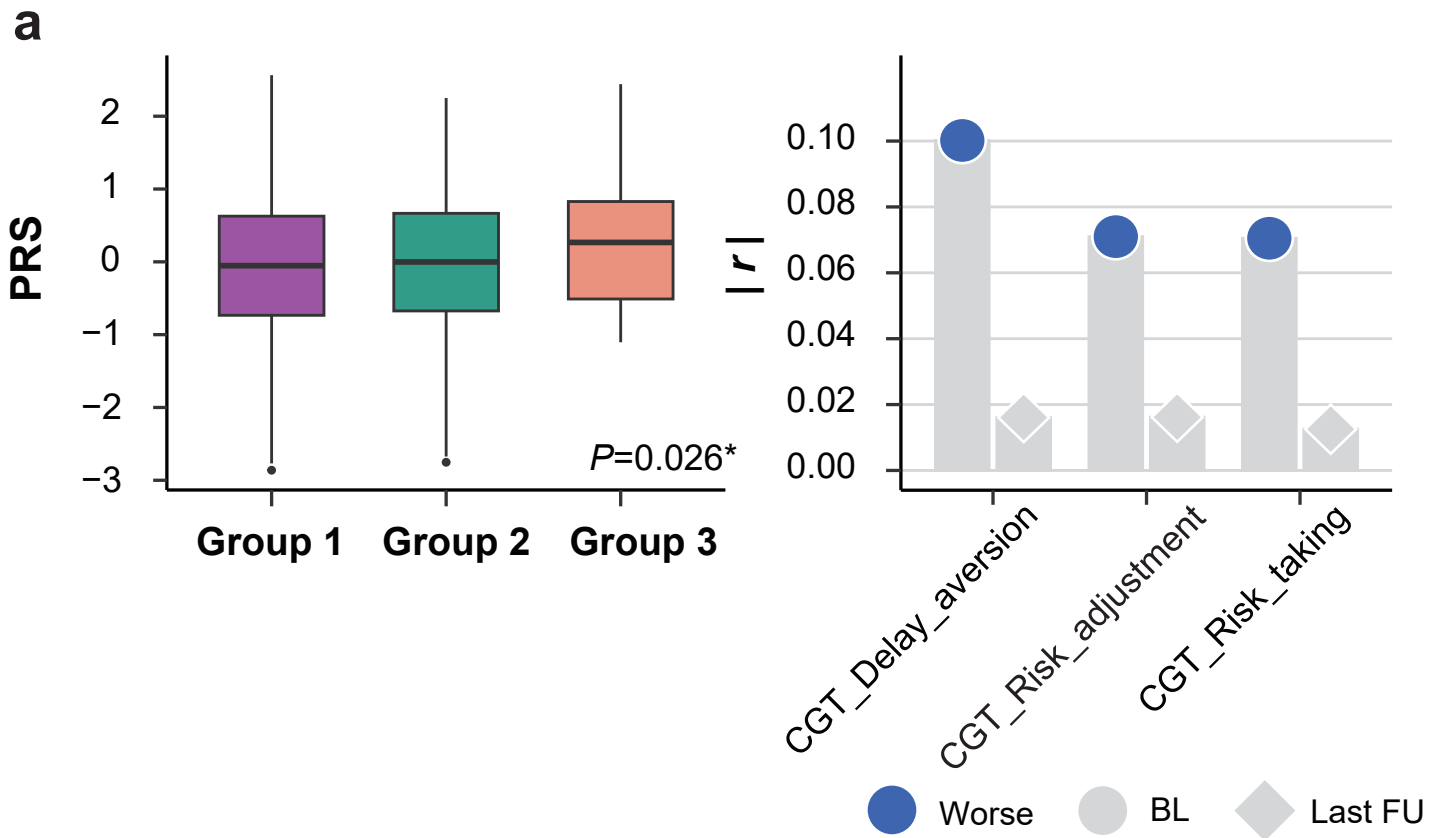

**Supplementary Fig. 12. Validation of GWAS results for delayed neurodevelopment in IMAGEN.** Box plot in **(a)** showed that PRS of delayed neurodevelopment was higher in Group 3 ( $n=60$ ) compared to Group 1 and 2 ( $n=1,338$ ) (two-sided t-test:  $P=0.012$ ). **(b)** indicated that PRS of delayed neurodevelopment was negatively correlated with baseline neurocognitive performance, and became non-significant at the last follow-up. CGT delay aversion, BL ( $r=0.10$ ,  $*P_{adj}=0.004$ ), FU3 ( $r=-0.02$ ,  $P_{adj}=0.682$ ); CGT risk adjustment, BL ( $r=-0.07$ ,  $*P_{adj}=0.032$ ), FU3 ( $r=-0.02$ ,  $P_{adj}=0.682$ ); CGT risk taking BL ( $r=0.07$ ,  $*P_{adj}=0.032$ ), FU3 ( $r=0.01$ ,  $P_{adj}=0.682$ ).

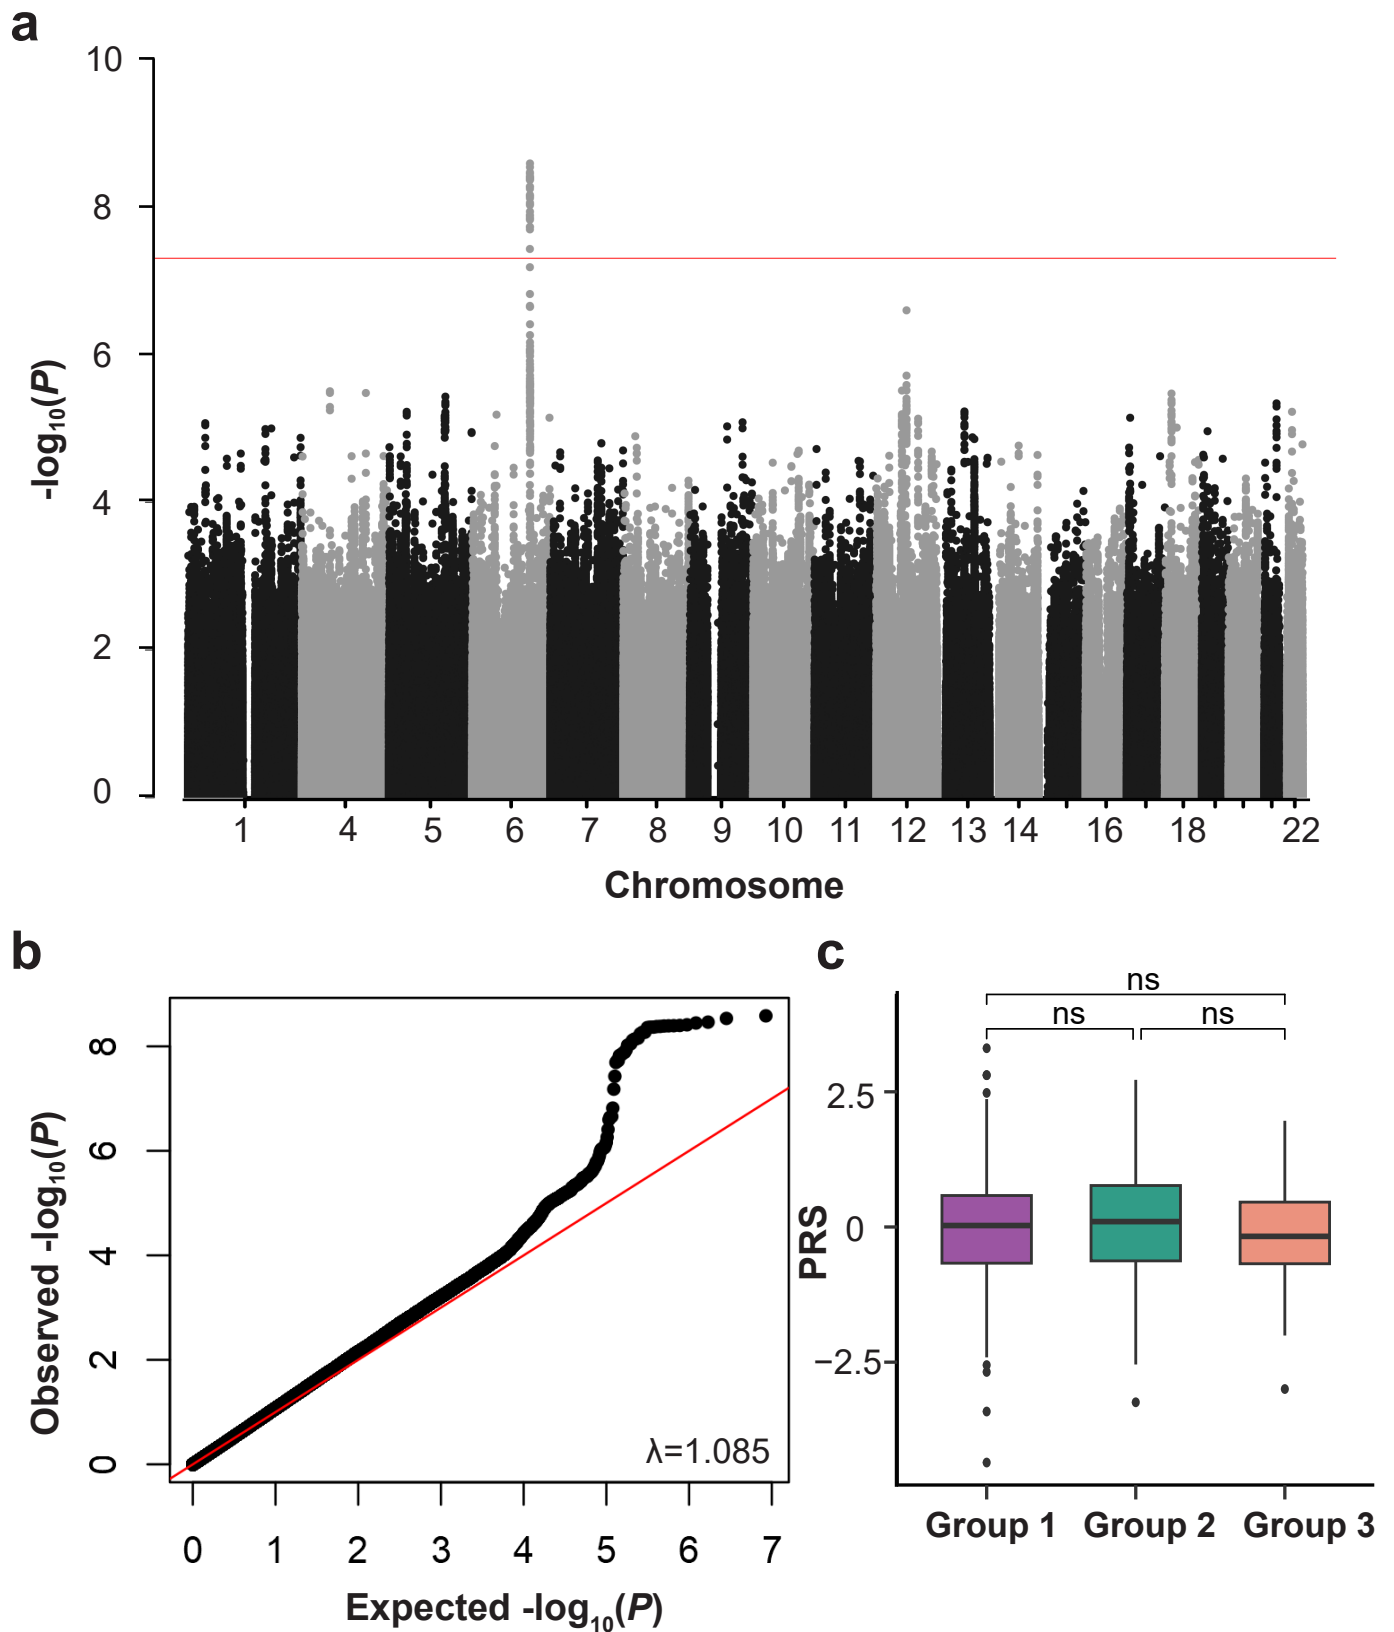

**Supplementary Fig. 13. GWAS results and validation for Group 2 vs Group 1.** (a) GWAS Manhattan plot for Group2-reweighted GMV in the ABCD population ( $n=7,662$ ). Group2-reweighted GMV was calculated for each adolescent (**Methods**) and used as the proxy phenotype. (b) Q-Q plot of GWAS for Group 2 vs Group 1. (c) indicated that PRS of Group2-reweighted GWAS didn't differ among groups.

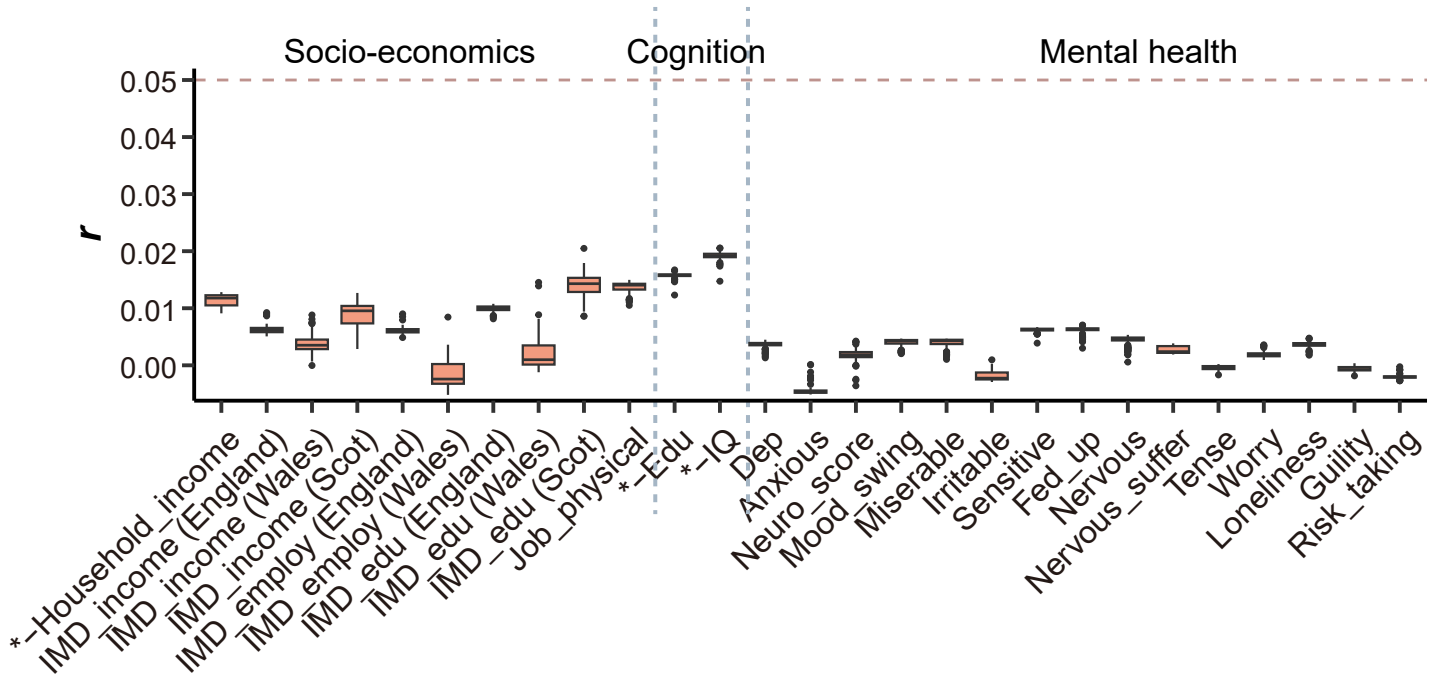

**Supplementary Fig. 14. Correlations between all PRS and socio-economics, cognitive and mental health and in UKB.** Non-inferiority test against 0.05 correlation coefficient showed that genetic variants had limited effect on the long-term cognitive, mental health and socio-economic outcomes ( $n=337,199$ ).



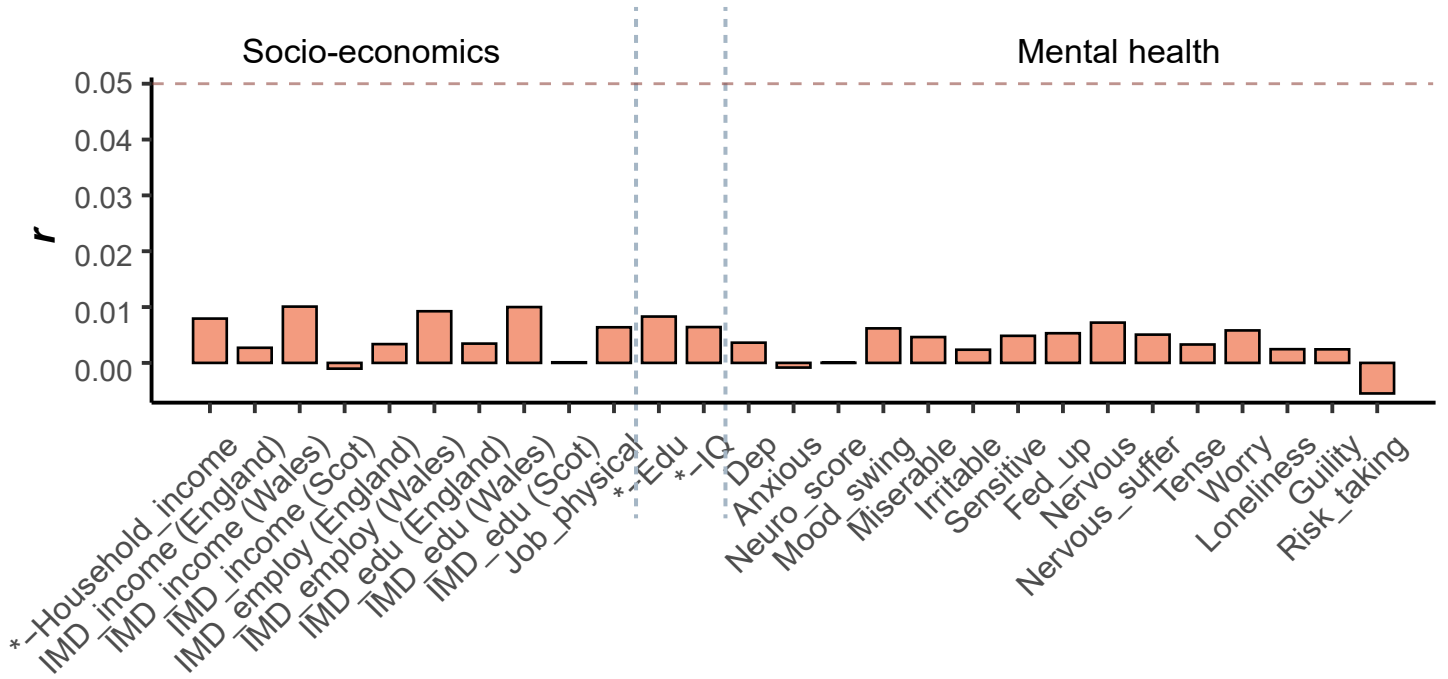

**Supplementary Fig. 15. Correlations between CENPW score and socio-economics, cognitive and mental health and in UKB.** Non-inferiority test against 0.05 correlation coefficient showed that genetic variants had limited effect on the long-term cognitive, mental health and socio-economic outcomes ( $n=337,199$ ).

## Group 3 vs Group 2

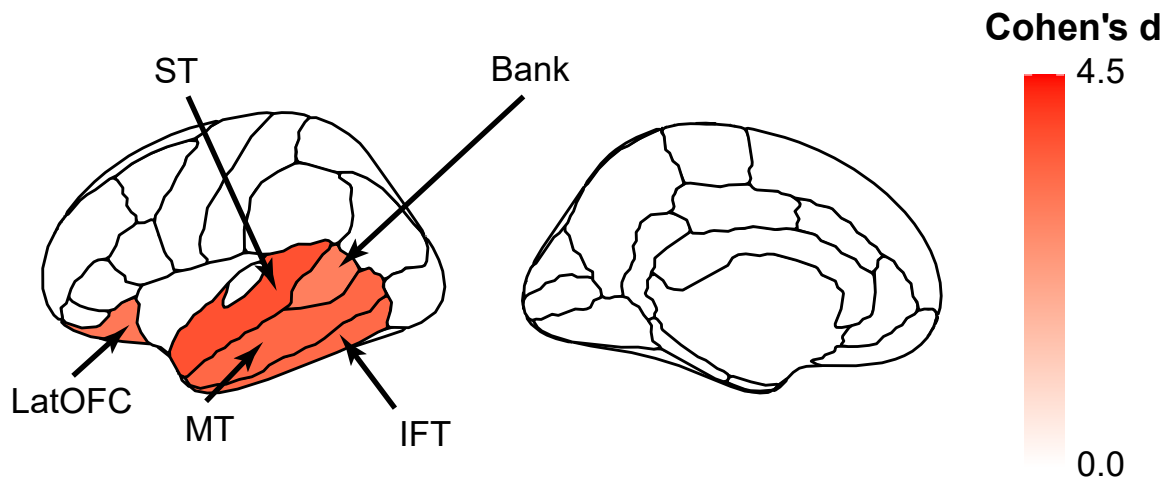

**Supplementary Fig. 16. The top 5 discriminating ROIs with largest  $t$  values comparing the GMV trajectories between Group 3 and Group 2.** Sex, imaging site, handedness and ICV were adjusted. IFT ( $d=3.33$ ,  $t=16.65$ ,  $***P_{adj}<0.001$ ), MT ( $d=3.37$ ,  $t=16.28$ ,  $***P_{adj}<0.001$ ), LatOFC ( $d=3.05$ ,  $t=14.60$ ,  $***P_{adj}<0.001$ ), ST ( $d=3.77$ ,  $t=14.55$ ,  $***P_{adj}<0.001$ ), Bank ( $d=2.92$ ,  $t=14.50$ ,  $***P_{adj}<0.001$ ). Bank, bankssts; IFT, inferior temporal; LatOFC, lateral orbitofrontal; MT, middle frontal; ST, superior temporal.

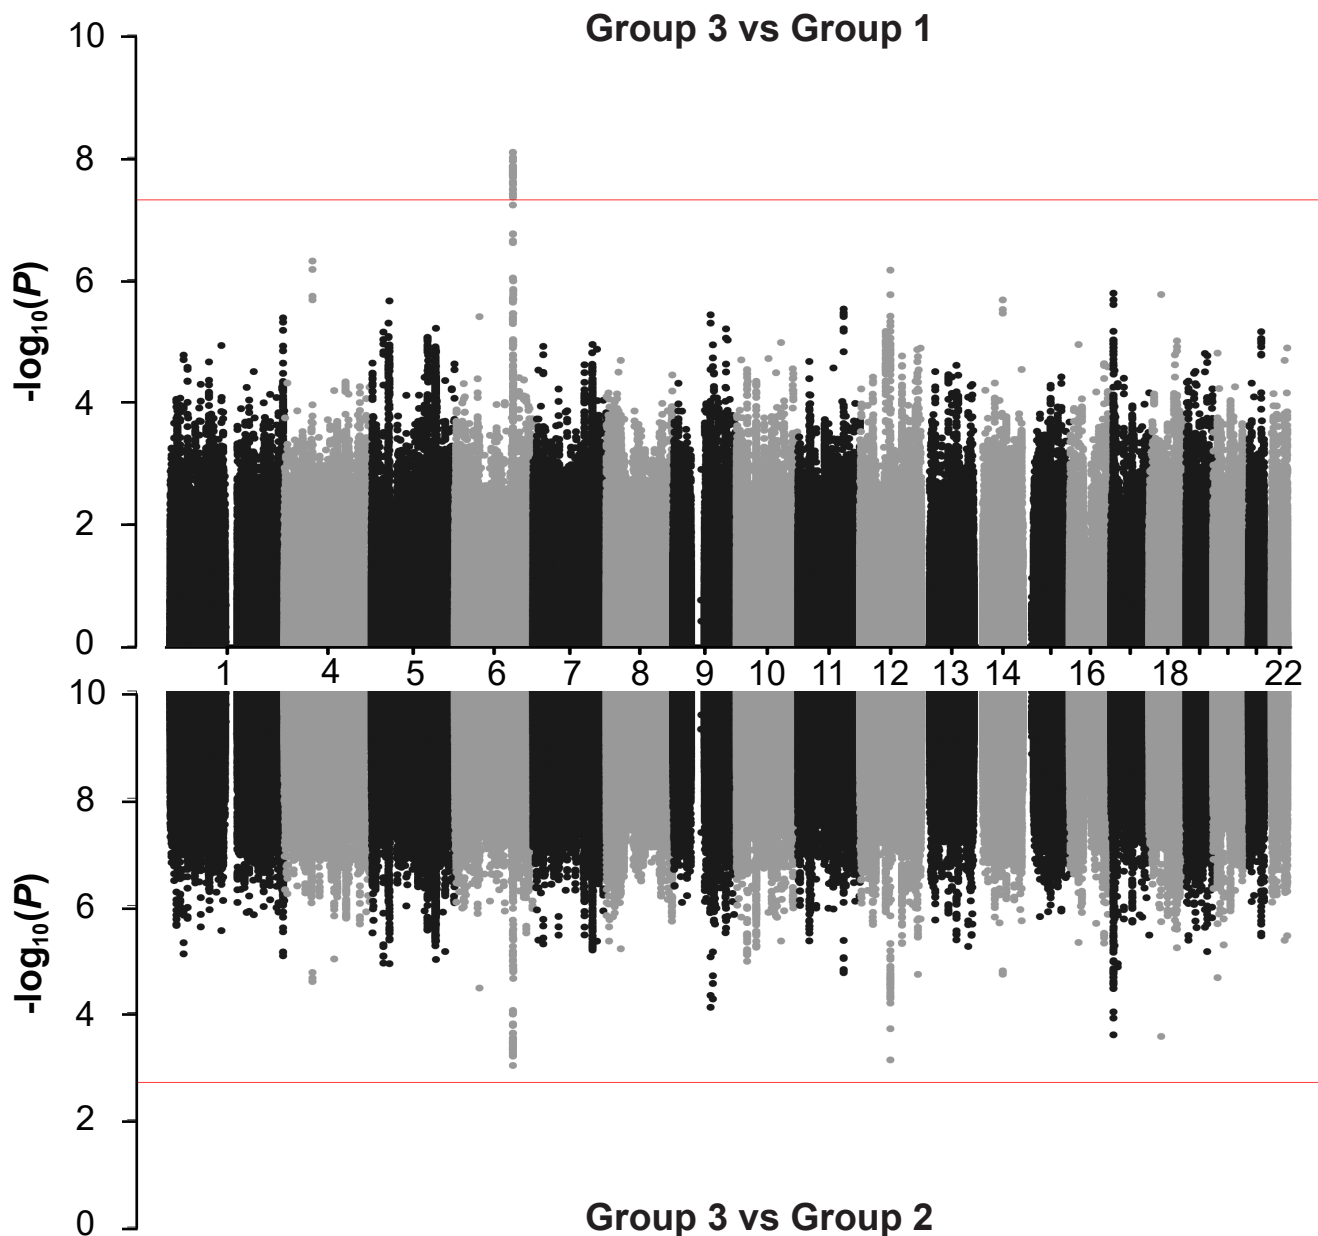

**Supplementary Fig. 17. Miami plot of GWAS for Group 3 vs Group 1 and Group 2.** GWAS Manhattan plots for Group3-reweighted (vs Group 1 on top and Group 2 on bottom) GMV in the ABCD population ( $n=7,662$ ) were compared. Reweighted GMV was calculated for each adolescent (**Methods**) and used as the proxy phenotype.

**Group 3 vs Group 1**

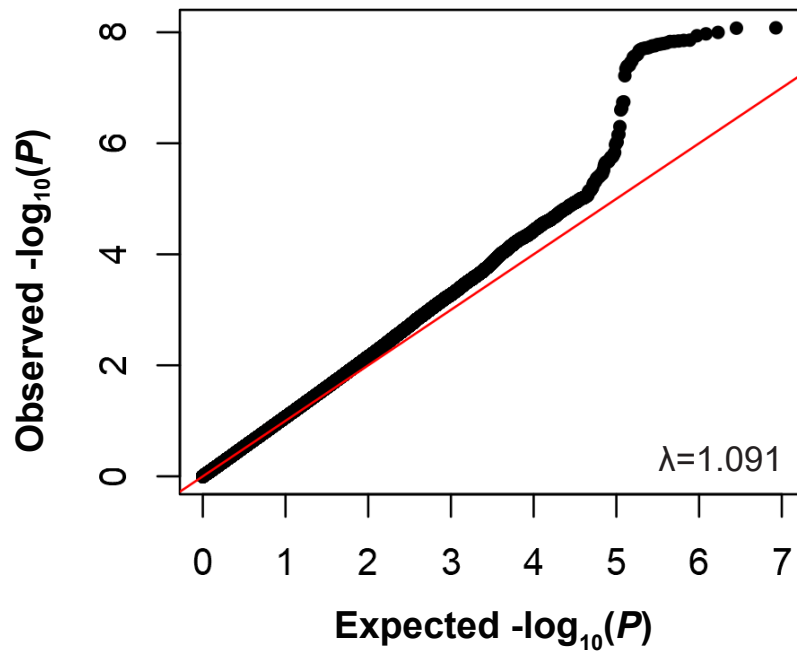

**Group 3 vs Group 2**

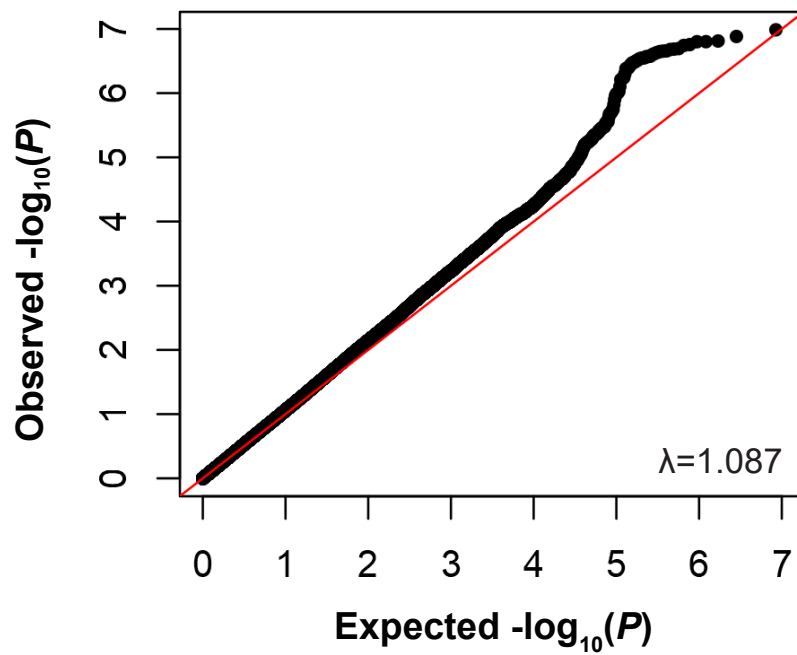

**Supplementary Fig. 18. Q-Q plots of GWAS for Group 3 vs Group 1 and Group 2.**

### SNP-based GWAS

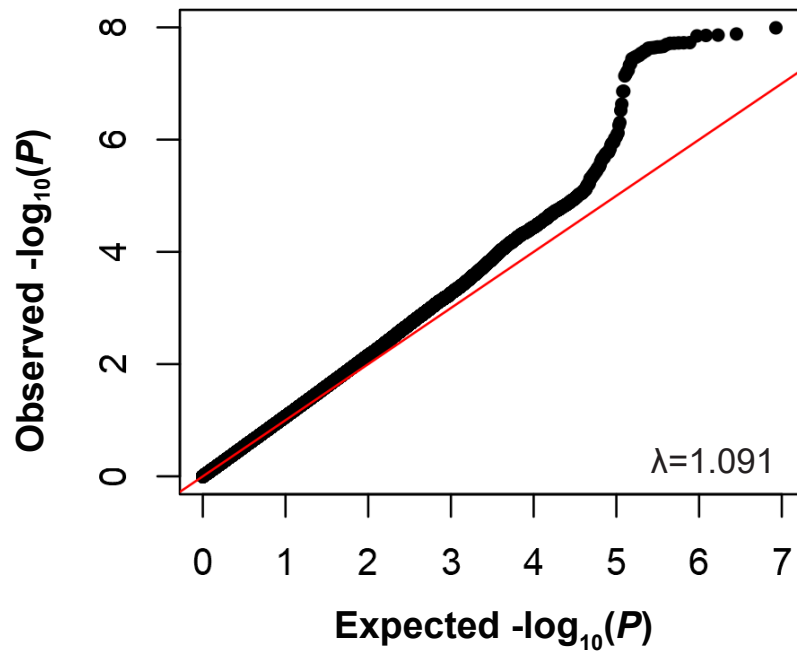

### Gene-based GWAS

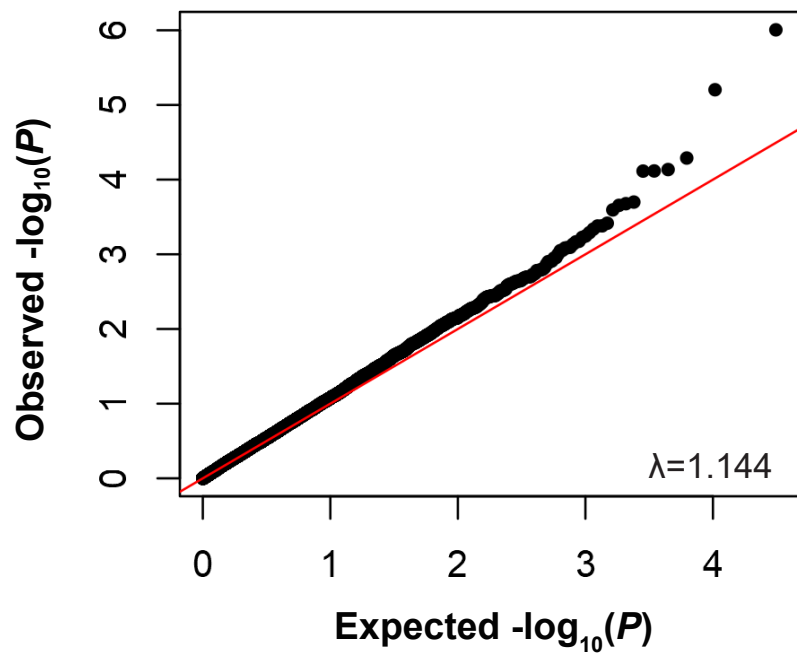

Supplementary Fig. 19. Q-Q plots of GWAS for Group 3 vs Group 1/2.
